1 **Discovery and characterization of H<sub>v</sub>1-type proton channels in reef-building corals.**

2

3 Gisela E. Rangel-Yescas<sup>1</sup>, Cecilia Cervantes<sup>1</sup>, Miguel A. Cervantes-Rocha<sup>1</sup>, Esteban Suarez-  
4 Delgado<sup>1</sup>, Anastazia T. Banaszak<sup>2</sup>, Ernesto Maldonado<sup>3</sup>, Ian. S. Ramsey<sup>4</sup>, Tamara Rosenbaum<sup>5</sup>  
5 and León D. Islas<sup>1\*</sup>

6

7 From:

8 <sup>1</sup>Departamento de Fisiología, Facultad of Medicina, Universidad Nacional Autónoma de  
9 México, Mexico City, Mexico

10 <sup>2</sup>Unidad Académica de Sistemas Arrecifales, Instituto de Ciencias del Mar y Limnología,  
11 Universidad Nacional Autónoma de México, Puerto Morelos, Quintana Roo, Mexico

12 <sup>3</sup>EvoDevo Research Group, Unidad Académica de Sistemas Arrecifales, Instituto de Ciencias  
13 del Mar y Limnología, Universidad Nacional Autónoma de México, Puerto Morelos, Quintana  
14 Roo, Mexico

15 <sup>4</sup>Department of Physiology and Biophysics, School of Medicine, Virginia Commonwealth  
16 University, Richmond, VA, USA

17 <sup>5</sup>Departamento of Neurociencia Cognitiva, Instituto de Fisiología Celular, Universidad  
18 Nacional Autónoma de México, Mexico City, Mexico

19

20

21

22

23

24 \*Correspondence to:

25 León D. Islas, PhD

26 Departamento de Fisiología

27 Facultad de Medicina, UNAM,

28 Ciudad Universitaria, Circuito Escolar S/N

29 Ciudad de México, 04510, México

30 [leon.islas@gmail.com](mailto:leon.islas@gmail.com)

31

## 32 **Abstract**

33 Voltage-dependent proton-permeable channels are membrane proteins mediating a number  
34 of important physiological functions. Here we report the presence of a gene encoding for Hv1  
35 voltage-dependent, proton-permeable channels in two species of reef-building corals. We  
36 performed a characterization of their biophysical properties and found that these channels  
37 are fast-activating and modulated by the pH gradient in a distinct manner. The biophysical  
38 properties of these novel channels make them interesting model systems. We have also  
39 developed an allosteric gating model that provides mechanistic insight into the modulation  
40 of voltage-dependence by protons. This work also represents the first functional  
41 characterization of any ion channel in scleractinian corals. We discuss the implications of the  
42 presence of these channels in the membranes of coral cells in the calcification and pH  
43 regulation processes and possible consequences of ocean acidification related to the function  
44 of these channels.

45

## 46 **Introduction**

47 Scleractinian or stony corals are organisms in the phylum Cnidaria that deposit calcium  
48 carbonate in the form of aragonite to build an exoskeleton. Stony corals are the main  
49 calcifying organisms responsible for the construction of coral reefs, which are major  
50 ecosystems hosting numerous and diverse organisms. Coral reefs also act as natural barriers  
51 from strong ocean currents, waves and tropical storms, providing coastal protection. This  
52 protection centers on the ability of scleractinian corals to produce enough calcium carbonate  
53 ( $\text{CaCO}_3$ ). The increase in atmospheric  $\text{CO}_2$  concentrations as a result of human activity poses  
54 threats to coral-reef building organisms due to rising sea surface temperatures (Hoegh-  
55 Guldborg, 1999) and because  $\text{CO}_2$  is taken up by the ocean, dangerously lowering the pH of  
56 the sea water (Caldeira and Wickett, 2003).

57 It is known that precipitation of the aragonitic form of calcium carbonate is facilitated at  
58 elevated pH values, at very low concentrations of protons. Calcification by scleractinian  
59 corals is a process that has been shown to be modulated by the pH of the solution in which  
60 calcium carbonate is precipitated (Allemand et al., 2011). To this end, corals produce a  
61 specialized compartment between the ectoderm and the external substrate or skeleton  
62 called calicoblastic compartment, which contains a fluid derived from the surrounding sea

63 water. The composition of this calciblastic fluid or liquor is strictly regulated by the coral to  
64 maintain both an elevated pH, often close to one unit higher than the surrounding sea water,  
65 and an increased concentration of  $\text{Ca}^{2+}$  and carbonates. The molecular details of pH regulation  
66 in the calciblastic fluid are not understood completely. Involvement of proton-pumps has  
67 been postulated and is likely to be part of proton transport in corals. Both P-type and V-type  
68 hydrogen pumps are present in coral transcriptomes and are known to play roles in the  
69 physiology of coral-algal symbiosis (Tresguerres et al., 2017). V-type  $\text{H}^+$ -ATPases have also  
70 been shown to be involved in calcification in foraminifera (Toyofuku et al., 2017). If a proton  
71 pump is involved in lowering proton concentration in the calciblastic fluid to maintain high  
72 calcification rates, protons will be transported to the cytoplasm of the ectodermal cells that  
73 constitute the calciblastic epithelium, producing a profound acidification of the cytoplasmic  
74 pH ( $\text{pH}_i$ ). Although measurements of the ( $\text{pH}_i$ ) in corals indicate values of 7.13-7.4 (Venn et  
75 al., 2009), it is unknown how coral cells regulate  $\text{pH}_i$ . Thus, an efficient pH-regulatory  
76 mechanism is to be expected to be present in corals. We hypothesized that proton channels  
77 might be fundamental to this physiological process and also required for calcification in hard  
78 corals.

79 Although a number of studies have delineated the physiological roles of  $\text{H}_v1$  voltage-gated  
80 proton channels in vertebrate cells (DeCoursey, 2013), less is known about their role in  
81 invertebrates. These channels are potential mediators in processes that are critically  
82 dependent on proton homeostasis. As an example, they have been shown to be involved in  
83 regulating the synthesis of the calcium carbonate skeleton in coccolithophores, calcifying  
84 unicellular phytoplankton (Taylor et al., 2011).

85 The range of voltages over which channel activation occurs is strongly modulated by the  
86 transmembrane proton gradient, characterized by:  $\Delta\text{pH} = \text{pH}_o - \text{pH}_i$  i.e., the difference  
87 between external and internal pH. In the majority of known  $\text{H}_v1$  channels, the voltage at  
88 which half the channels are activated, the  $V_{0.5}$  or the apparent threshold for channel opening  
89 ( $V_{\text{Thr}}$ ), shifts by roughly 40 mV per unit of  $\Delta\text{pH}$ . Thus, the pH gradient strongly biases the  
90 voltage-independent free energy of channel activation (Cherny et al., 1995). With few  
91 exceptions, channel activation occurs at voltages that are more positive than the reversal  
92 potential for protons, implying that protons are always flowing outward under steady-state

93 conditions. The fact that most H<sub>v</sub>1s mediate outward currents is the reason these channels  
94 are mostly involved in reversing intracellular acidification or producing voltage-dependent  
95 cytoplasmic alkalization (Lishko and Kirichok, 2010; DeCoursey, 2013).  
96 Here we report the presence of genes encoding for H<sub>v</sub>1 channels in two species of reef-  
97 building corals. We cloned and characterized the biophysical properties of these channels in  
98 an expression system using patch-clamp electrophysiology. The demonstration of the  
99 presence of voltage-gated proton channels in corals is an initial step to a deeper  
100 understanding of coral calcification and its dysregulation under ocean acidification  
101 conditions. We show that some of the coral H<sub>v</sub>1's biophysical properties are different from  
102 other known proton channels and this behavior makes them interesting models to try to  
103 understand some basic biophysical mechanisms in these channels. To explain this behavior,  
104 we develop a novel activation model to describe voltage- and pH-dependent gating that has  
105 general applicability to H<sub>v</sub>1 channels.

106

## 107 **Materials and methods**

108 *Identification of H<sub>v</sub>1 sequences and cloning.* Blast searches of the transcriptome of the Indo-  
109 Pacific coral *Acropora millepora* (Moya et al., 2012) detected four sequences that we  
110 identified as belonging to a putative proton-permeable channel. The GenBank accession  
111 numbers for these are: XM\_015907823.1, XM\_015907824.1, XM\_029346499.1 and  
112 XM\_029346498.1. We designed two pairs of oligonucleotides to amplify two of these  
113 sequences (Table 1). Total RNA was extracted from tissue obtained from a fragment of  
114 *Acropora millepora* acquired from a local salt-water aquarium provider. RNA was extracted  
115 by dipping the whole fragment for 2 min in 5 ml of solution D (4 M guanidinium thiocyanate,  
116 25 mM sodium citrate, 5 % sarkosyl and 0.1 M 2-mercaptoethanol). After incubation, tissue  
117 was removed by gently pipetting the solution for 2 min. At this point, the calcareous skeleton  
118 was removed and RNA extraction continued according to (Chomczynski and Sacchi, 1987).  
119 Total RNA (1 µg) from *A. millepora* was used for RT-PCR, employing oligo dT and  
120 SuperScripII reverse transcriptase (Invitrogen, USA). Complementary DNA obtained from  
121 RT-PCR was used in three PCR reactions using oligos: 1) AcHv1Nter5' and 3'; 2) AcHv1Cter5'  
122 and 3' and, 3) AcHv1Nter5' and AcHv1Cter3' (Table 1). The Platinum Pfx DNA polymerase  
123 (Invitrogen) was used for amplification according to the manufacturer's instructions. 1 µl of

124 Taq DNA polymerase (Invitrogen, USA) was used for 10 min at 72 °C to add a poly A tail at 5'  
125 and 3' ends and facilitate cloning into the pGEM-T vector.

126 The PCR reaction 3 gave rise to a full open reading frame (ORF) containing AmH<sub>v</sub>1. New  
127 oligos AcHv1Nter5' and AcHv1Cter3' containing restriction sites Kpn1 and Not1 respectively  
128 were used to re-amplify the ORF in pGEM-T and subclone it into pcDNA3.1 for heterologous  
129 expression.

130 The H<sub>v</sub>1 channel from *A. palmata* was cloned from a fragment of an adult specimen collected  
131 in the Limones Reef off of Puerto Morelos, Mexico. RNA extraction from small coral pieces  
132 was carried out by flash freezing in liquid nitrogen and grinding the frozen tissue. All other  
133 cloning procedures were as for *A. millepora*. All clones were confirmed by automatic  
134 sequencing at the Molecular Biology Facility of the Instituto de Fisiología Celular at UNAM.

135  
136 *Heterologous expression of AmH<sub>v</sub>1.* The cloned AmH<sub>v</sub>1 was expressed in HEK293 cells. Cells  
137 were grown on 100 mm culture dishes with 10 ml of Dulbecco's Modified Eagle Medium  
138 (DMEM, Invitrogen) containing 10 % fetal bovine serum (Invitrogen, USA) and 100 units/ml-  
139 100 µg/ml of penicillin-streptomycin (Invitrogen, USA), incubated at 37°C in an incubator  
140 with 5.2 % CO<sub>2</sub> atmosphere. When cells reached 90 % confluence, the medium was removed,  
141 and the cells were treated with 1 ml of 0.05 % Trypsin-EDTA (Invitrogen, USA) for 5 min.  
142 Subsequently, 1 ml of DMEM with 10 % FBS was added. The cells were mechanically  
143 dislodged and reseeded in 35 mm culture dishes over 5x5 mm coverslips for  
144 electrophysiology or in 35 mm glass bottom dishes for FRET experiments. In both cases, 2  
145 ml of complete medium were used. Cells at 70 % confluence were transfected with  
146 pcDNA3.1-AmH<sub>v</sub>1 prepared from a plasmid midiprep, using jetPEI transfection reagent  
147 (Polyplus Transfection, France). For patch-clamp experiments, pEGFP-N1 (BD Biosciences  
148 Clontech, USA) was cotransfected with the channel DNA to visualize successfully transfected  
149 cells via their green fluorescence. Electrophysiological recordings were done one or two days  
150 after transfection.

151  
152 *FRET measurement of stoichiometry.* In order to measure the stoichiometry of subunit  
153 interaction employing FRET, we constructed fusion proteins between AmH<sub>v</sub>1 and mCerulean

154 and mCitrine fluorescent proteins (FPs), to be used as donor and acceptor, respectively. The  
155 FPs were fused to the N-terminus of the channel in order to disrupt as little as possible the  
156 C-terminus mediated interaction. These constructs were transfected into HEK293 cells as  
157 described above. The apparent FRET efficiency between FP-containing constructs,  $E_{app}$ , was  
158 measured via sensitized emission of the acceptor, employing the spectral-FRET method (De-  
159 la-Rosa et al., 2013; Zheng et al., 2002). Fluorescence was measured in a home-modified TE-  
160 2000U inverted epifluorescence microscope (Nikon, Japan). The excitation light source was  
161 an Argon Ion laser (Spectra-Physics, Germany) mainly producing light at 458, 488 and 514  
162 nm; the laser beam is focused and then collimated using a 3 mm ball lens and a 50 mm focal  
163 length planoconvex lens. Collimated light is steered with a mirror and then is focused into  
164 the objective back focal plane by a 300 mm focal length achromatic lens.

165 Cells were imaged with a Nikon 60X oil immersion objective (numerical aperture 1.4). The  
166 detection arm of the microscope is coupled to a spectrograph (Acton Instruments, USA) and  
167 an EM-CCD camera (Ixon, Andor, Ireland) controlled by Micromanager software (Edelstein  
168 et al., 2014). Excitation was achieved with appropriate excitation filters (Chroma, Vermont,  
169 USA) for mCerulean (458 nm) and mCitrine (488 nm). The emission filter was a long-pass  
170 filter in order to collect the full emission spectrum of the FRET pair. Apparent FRET  
171 efficiency is plotted as a function of the fluorescence intensity ratio ( $I_{donor}/I_{acceptor}$ ). This  
172 relationship can be fitted with models of subunit association with fixed stoichiometry,  
173 according to (De-la-Rosa et al., 2013).

174

175 *Electrophysiology.* All chemicals for solutions were acquired from Sigma-Aldrich (Mexico).  
176 Proton current recordings were made from HEK293 cells expressing pCDNA3.1-AmH<sub>v</sub>1 in  
177 the inside-out, whole-cell and outside-out configurations of the patch-clamp recording  
178 technique. For whole-cell and inside-out recordings, the extracellular solution (bath and  
179 pipette, respectively) was (in mM): 80 TMA-HMESO<sub>3</sub>, 100 buffer (MES: pH 5.5, 6.0 and 6.5;  
180 HEPES: pH 7.0, 7.5), 2 CaCl<sub>2</sub>, 2 MgCl<sub>2</sub> and pH adjusted NMDG/TMAOH and HCl. The  
181 intracellular solution (pipette and bath respectively) was (in mM): 80 TMA-HMESO<sub>3</sub>, 100  
182 buffer (MES: pH 5.5, 6.0 and 6.5; HEPES: pH 7.0, 7.5), 1 EGTA and pH adjusted NMDG/TMAOH  
183 and HCl.

184 *Conditions for recording zinc effects.* The effect of zinc was evaluated in outside-out patches  
185 at a  $\Delta\text{pH}$  of 1. The bath solution composition was (in mM): 100 TMA-HMESO<sub>3</sub>, 100 HEPES, 8  
186 HCl, 2 CaCl<sub>2</sub>, 2 MgCl<sub>2</sub>, and the indicated concentration of ZnCl<sub>2</sub>. The pipette solution was (in  
187 mM): 100 TMA-MESO<sub>3</sub>, 100 MES, 8 HCl, 10 EGTA and 2 MgCl<sub>2</sub>. Both solutions were adjusted  
188 to pH 7 and pH 6 respectively with TMA-OH/HCl. Patches were placed in front of a perfusion  
189 tube that was gravity-fed with the appropriate solution. Tubes were changed with a home-  
190 built rapid perfusion system.

191 Macroscopic currents were low-pass filtered at 2.5 kHz, sampled at 20 kHz with an Axopatch  
192 200B amplifier (Axon Instruments, USA) using an Instrutech 1800 AD/DA board (HEKA  
193 Elektronik, Germany) or an EPC-10 amplifier (HEKA Elektronik, Germany). Acquisition  
194 control and initial analysis was done with PatchMaster software. Pipettes for recording were  
195 pulled from borosilicate glass capillaries (Sutter Instrument, USA) and fire-polished to a  
196 resistance of 4-7 M $\Omega$  when filled with recording solution for inside- and outside-out  
197 recordings and 1-3 M $\Omega$  for whole-cell. The bath (intracellular) solutions in inside-out patches  
198 were changed using a custom-built rapid solution changer. For whole-cell recordings all the  
199 bath solution was exchanged to manipulate pH. In some recordings, linear current  
200 components were subtracted using a p/4 subtraction protocol.

201  
202 *Data analysis.* Conductance,  $G$ , was calculated from I-V relations assuming ohmic  
203 instantaneous currents, according to:

$$204 \quad I(V) = G \cdot (V - V_{rev})$$

205 The normalized conductance-voltage ( $G$ - $V$ ) relations were fit to a Boltzmann function  
206 according to equation 1:

$$207 \quad \frac{G}{G_{max}} = \frac{1}{1 + \exp\left(\frac{q(V - V_{0.5})}{K_B T}\right)} \quad \text{Equation 1.}$$

208 Here,  $V_{0.5}$  is the voltage at which  $G/G_{max} = 0.5$ ,  $q$  is the apparent gating charge (in elementary  
209 charges,  $e_0$ ) and  $K_B$  is the Boltzmann constant and  $T$  temperature in Kelvin (22°C).

210 The time constant of activation was estimated via a fit of the second half of currents to the  
211 equation:

212 
$$I(t) = I_{ss} \cdot \left(1 - e^{\left(\frac{-(t-\delta)}{\tau}\right)}\right)$$
 Equation 2.

213 Where  $I_{ss}$  is the amplitude of the current at steady-state,  $\delta$  is the delay of the exponential with  
214 respect to the start of the voltage pulse and  $\tau$  is the time constant, both with units of ms. The  
215 voltage-dependence of  $\delta$  and  $\tau$  were estimated from a fit to equation:

216 
$$k(V) = k(0)e^{(-Vq_i/K_B T)}$$
 Equation 3.

217 Where  $i$  stands for  $\delta$  or  $\tau$  and  $k(0)$  is the value of either parameter at 0 mV.

218 Currents in the presence of zinc were normalized to the current before application of the ion  
219 to obtain a normalized fraction of current blocked as:  $F_B = 1 - I/I_{max}$ . The zinc dose response  
220 curve was fitted to Hill's equation in the form:

221 
$$F_B = \frac{1}{1 + \left(\frac{K_D}{[Zn]_o}\right)^{n_H}}$$
 Equation 4.

222  $K_D$  is the apparent dissociation constant,  $[Zn^{2+}]_o$  is the extracellular zinc concentration and  
223  $n_H$  is the Hill coefficient.

224

## 225 Results

226 Ion channels have not been studied in corals. In an effort to initiate their study in these  
227 organisms, we searched the transcriptome of the Indo-Pacific coral *Acropora millepora*  
228 (Moya et al., 2012) for sequences coding for putative voltage-sensing residues present in  
229 canonical  $H_v1$  channels with the form: RxxRxxRIx, which corresponds to the S4 segment of  
230  $H_v1$  channels and is also found in other voltage-sensitive membrane proteins. Blast searches  
231 detected four sequences that seem to correspond to a gene encoding the  $H_v1$  voltage-  
232 activated proton-selective ion channel (Ramsey et al., 2006; Sasaki et al., 2006). *Acropora*  
233 *millepora* is one of the most widely studied species of scleractinian corals and is well  
234 represented in the commercial coral trade (Cleves et al., 2018; Ying et al., 2019). We  
235 proceeded to clone this gene from a small specimen of *A. millepora* obtained from a local  
236 aquarium (Reef Services, Mexico City). As indicated in the methods section, total RNA was  
237 extracted from tissue and mRNA was retrotranscribed to obtain cDNA. We managed to  
238 obtain a full-length clone and refer to this sequence as Am $H_v1$  or  $H_v1$ -type proton channel of  
239 *Acropora millepora*.



240 We were interested in knowing if the same gene is present in a closely related species from  
241 the Caribbean Sea. Thus, we used the same primers to clone the H<sub>v</sub>1 channel from *Acropora*  
242 *palmata*, a widespread coral in the same family and which we call ApH<sub>v</sub>1. The amino acid  
243 sequence is almost identical to AmH<sub>v</sub>1 (Figure 1-Supplement1A), the greatest divergence is  
244 found between a few amino acid residues in the C-terminal region. This result suggests that  
245 despite the large biogeographic difference, these two genes have not diverged significantly.  
246 The ApH<sub>v</sub>1 sequence also gives rise to fast-activating voltage-gated proton currents (Figure  
247 1-Supplement1B).

248 The most diagnostic feature of the H<sub>v</sub>1 protein is the sequence of the fourth transmembrane  
249 domain or S4, which contains three charged amino acids in a characteristic triplet repeat.  
250 The presence of these repeats in our sequence allowed us to initially identify our clone as an  
251 H<sub>v</sub>1 channel. However, we decided to compare our sequence to those of several  
252 H<sub>v</sub>1 orthologues. We selected a list of 130 H<sub>v</sub>1 protein sequences that are well curated in the  
253 Gene Bank (<https://www.ncbi.nlm.nih.gov/>), representing several branches of the  
254 eukaryotes, from unicellular plants to mammals. As expected, the protein sequence of AmH<sub>v</sub>1  
255 has similarity to several other H<sub>v</sub>1 genes from varied organisms (Figure 1A). The identity  
256 varies from 98% when compared to other putative coral and anemone sequences, to less  
257 than 30% when compared to plant and nematode sequences. In spite of this variability, the  
258 putative transmembrane domains of all these proteins show high conservation and  
259 consensus sequences logos can detect the presence of highly conserved individual amino  
260 acid sequences that can be considered characteristic of H<sub>v</sub>1 channels. Figure 1B compares  
261 these transmembrane domain consensus logos with our AmH<sub>v</sub>1 sequence. It can be gleaned  
262 that AmH<sub>v</sub>1 contains the highly conserved residues that form the voltage-sensing amino acid  
263 residues in S4 as well as their acidic pairs present in S2 and S3. The extracellular histidine  
264 residues involved in Zn<sup>2+</sup> coordination are also present. These results suggest that our  
265 sequence is that of a *bona fide* H<sub>v</sub>1 voltage-sensing domain (VSD).

266

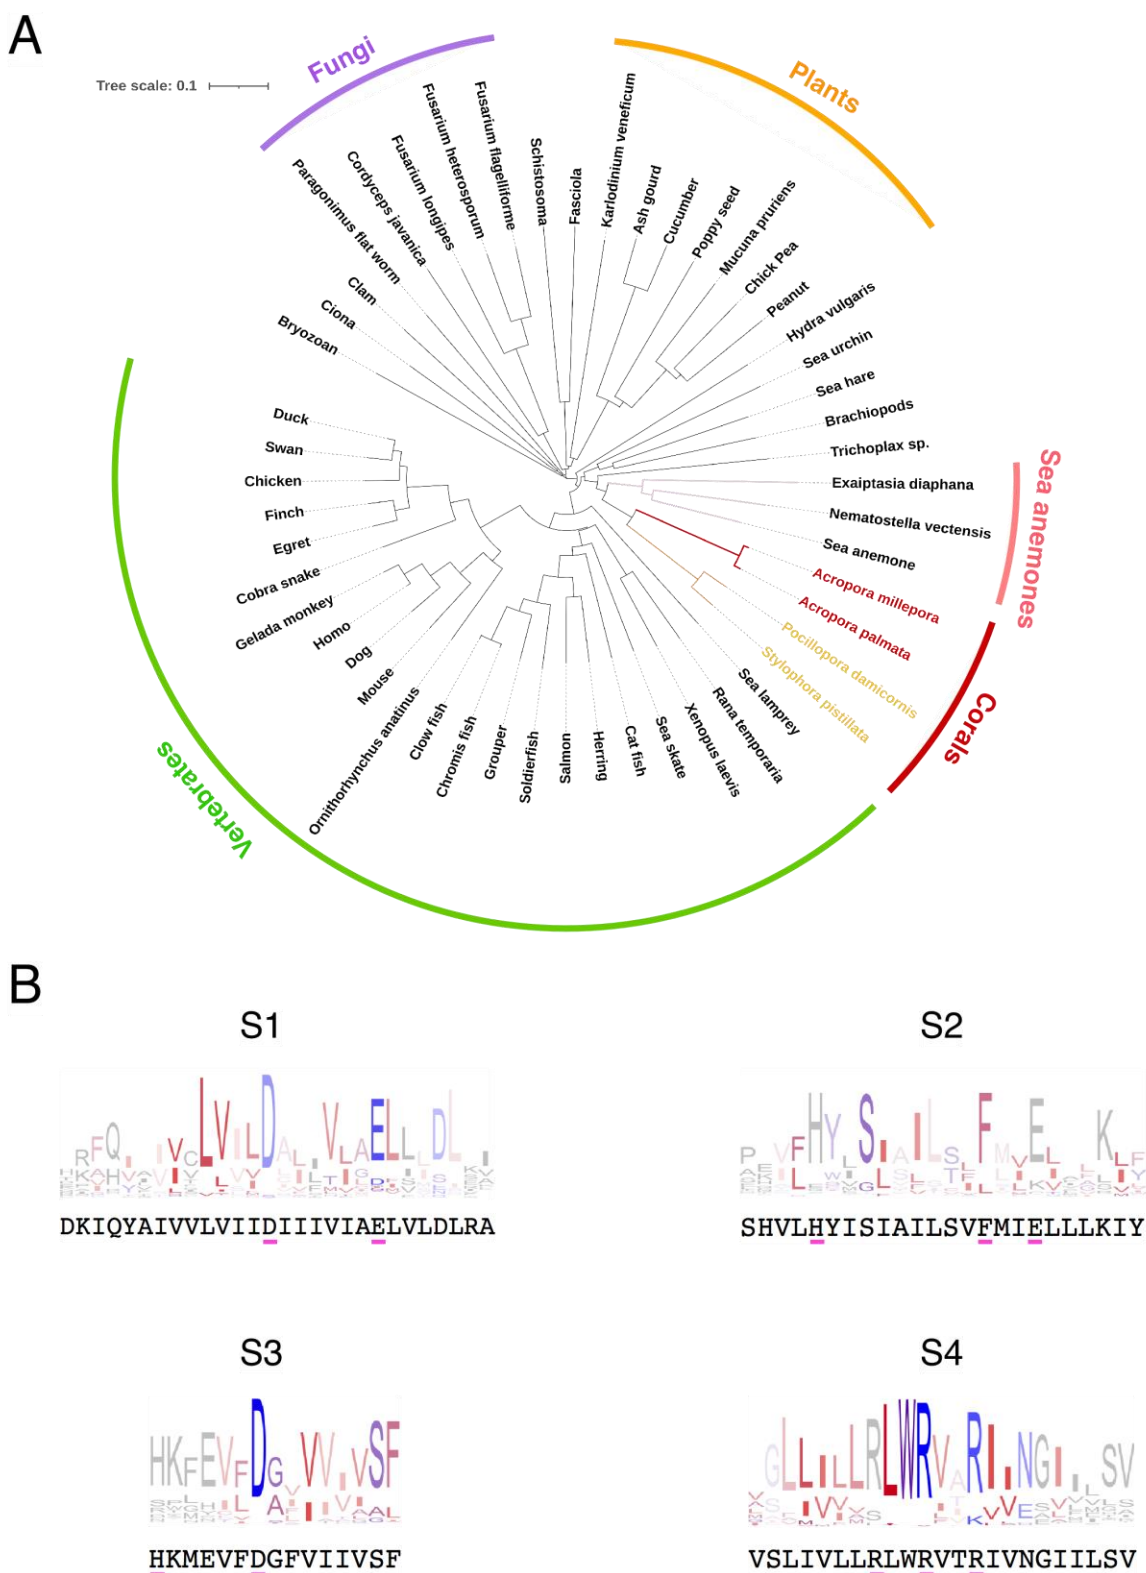

268 **Figure 1. Conservation and phylogenetic relationships of H<sub>v</sub>1 channels.** A) Tree  
269 obtained from a multiple sequence alignment from H<sub>v</sub>1 channels in CLUSTAL-O. Highlighted  
270 in red and yellow are the branches containing coral H<sub>v</sub>1 sequences. B) Consensus logo  
271 sequences of transmembrane domains of H<sub>v</sub>1 channels. The color code indicates the  
272 hydrophobicity of each residue, where blue indicates charged residues, red indicates non-  
273 polar residues and other colors indicate either non-polar or charged residues with less  
274 conservation.

275  
276 Apart from canonical voltage-gated channels, several other proteins contain VSDs. Examples  
277 are the voltage-sensing phosphatases like VSPs (Iwasaki et al., 2008) and TPTE and TPTE2  
278 (Halaszovich et al., 2012) proteins (transmembrane protein with Tensin homology) and  
279 genes like TMEM266. These proteins are relevant to us since some TPTEs have been shown  
280 to also mediate proton currents and TMEM266 can be modulated by Zn<sup>2+</sup> (Papp et al., 2019).  
281 We compared the sequence of AmH<sub>v</sub>1 with several orthologues of TPTEs and TMEM266.  
282 Although there is some similarity within transmembrane domains (Figure 1-Supplement 2),  
283 the overall sequence comparison shows that AmH<sub>v</sub>1 and these VSD-containing proteins are  
284 different.

285 As mentioned before, we performed a multiple sequence alignment with 130 H<sub>v</sub>1 sequences.  
286 In Figure 2 we show the detailed sequence alignment of AmH<sub>v</sub>1 with five of these sequences,  
287 which represent some of the best studied H<sub>v</sub>1 genes. It can be seen that there is a high degree  
288 of identity, especially in the transmembrane domains. The least degree of conservation  
289 appears when comparing this sequence to the dinoflagellate *Karlodinium veneficum* H<sub>v</sub>1  
290 channel (Figure 2A). A search of available transcriptomes from several coral species allowed  
291 us to detect the presence of sequences that are found in H<sub>v</sub>1 channels. This suggests that H<sub>v</sub>1  
292 proton channels might be found in many families of scleractinian corals (Figure 2-  
293 Supplement 1), as has also been recently shown (Capasso et al., 2021).

294 Secondary-structure prediction suggests that AmH<sub>v</sub>1 is a canonical H<sub>v</sub>1 channel formed by a  
295 voltage-sensing domain with four transmembrane segments. The protein sequence was used  
296 for 3D modeling using the SWISS MODEL server (Waterhouse et al., 2018), which produced  
297 models based on the H<sub>v</sub>1 chimera structure (Takeshita et al., 2014a) and the Kv1.2 potassium  
298 channel voltage-sensing domain (Long et al., 2005). This structural model is shown in Figure

299 2B. The predicted model indicates a shortened N-terminal region, four transmembrane  
 300 domains and a long C-terminal helix.

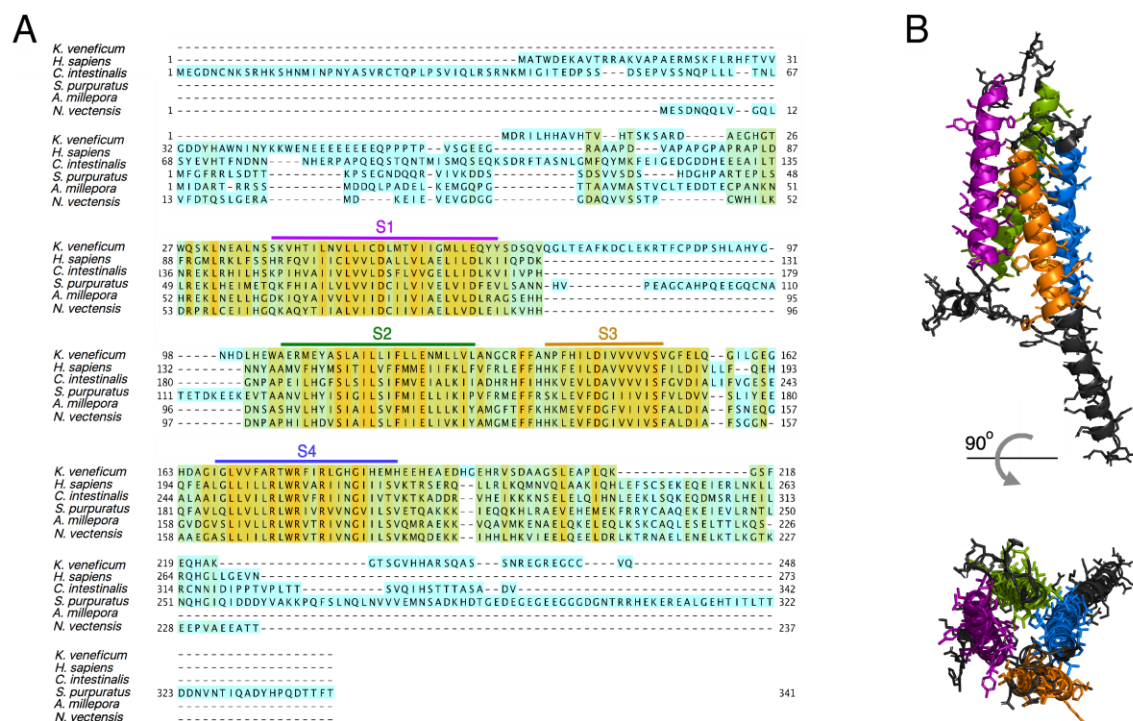

Figure 2

301  
 302  
 303 **Figure 2. Protein sequence alignment of the *Acropora millepora* Hv1 (AmHv1) channel**  
 304 **with selected Hv1s from other organisms.** A) Amino acid sequence alignment of AmHv1  
 305 with other known Hv1 orthologues provided by the CLUSTAL-O algorithm. The predicted  
 306 transmembrane domains are shown by the colored horizontal lines and letters. The colors  
 307 highlighting the sequence indicate sequence identity. Orange indicates identical amino acids,  
 308 blue indicates no identity. B) Predicted structural topology of AmHv1. Transmembrane  
 309 domains are colored to correspond with the sequences in A. The top panel is the view parallel  
 310 to the membrane while the bottom panel is the view from the top (extracellular) side.

311  
 312

313 Voltage-gated proton channels from *Ciona* (Sasaki et al., 2006) and humans (Lee et al.,  
314 2008a) have been shown to express as dimers in the plasma membrane and this dimeric  
315 form is understood to be the functional unit of these proton channels. The dimer is stabilized  
316 by a coiled-coil interaction mediated by an alpha helical C-terminal domain. As shown by the  
317 model in Figure 2, AmH<sub>v</sub>1 has a long C-terminal helix, which is predicted to engage in a  
318 coiled-coil (Paircoil2 (McDonnell et al., 2006). We calculated the probability per residue to  
319 form a coiled-coil for all the C-terminal residues, both for human and AmH<sub>v</sub>1 channels, using  
320 the program COILS (Lupas et al., 1991). Figure 3A shows that the coiled-coil probability for  
321 AmH<sub>v</sub>1 C-terminus is at least as high or higher than that for hH<sub>v</sub>1, an established dimer,  
322 strongly suggesting that coral H<sub>v</sub>1s might also form dimers.

323 In order to study the oligomeric state of the coral H<sub>v</sub>1, we performed FRET experiments with  
324 AmH<sub>v</sub>1 channel tagged with fluorescent proteins as a FRET pair. Figure 3B shows that there  
325 is significant FRET efficiency between fluorescent protein-tagged subunits, indicating a very  
326 close interaction between monomers. The measured apparent FRET efficiency vs. the  
327 fluorescence intensity ratio can be fitted to a model where the subunits assemble as a dimer.  
328 From this fit, we can estimate a distance between fluorophores of ~60 Å, which is compatible  
329 with AmH<sub>v</sub>1 being a dimer, at least in HEK293 cells.

330

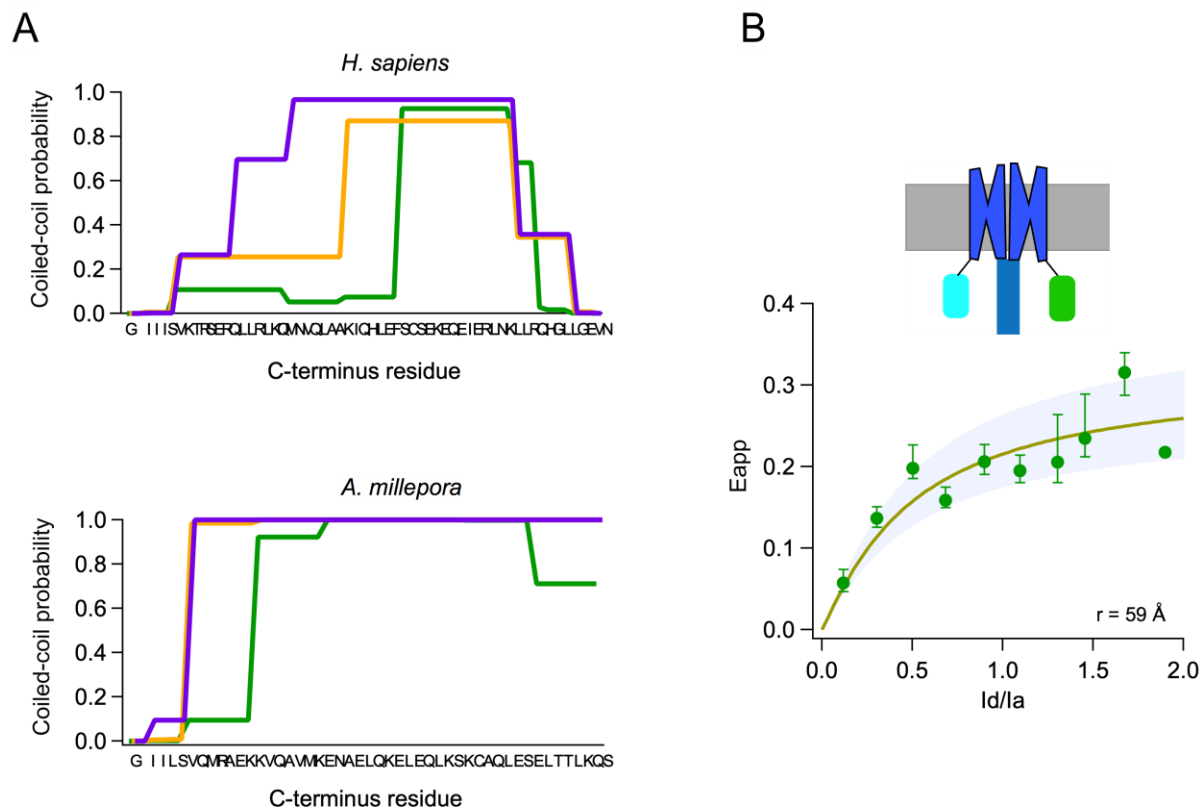

Figure 3

331  
 332 **Figure 3. Subunits of the *Acropora millepora* Hv1 (AmHv1) channel associate to form**  
 333 **dimers.** A) Probability of coiled-coil formation per amino acid residue of the C-terminus  
 334 domain of hHv1 (top) and AmHv1 (bottom). The different colors correspond to the three  
 335 seven-residue windows used by the program to calculate the score. The sequence of the C-  
 336 terminus is shown in the x-axis. B) FRET measurement of dimer formation. The apparent  
 337 FRET measured from 134 cells is plotted as a function of the ratio of donor to acceptor  
 338 fluorescence ( $I_d/I_a$ ). Shown is the average and s.e.m. for data in  $I_d/I_a$  windows of 0.1. The  
 339 continuous curve is the fit of the data to the prediction of a model that considers random  
 340 assembly of donor- and acceptor-tagged subunits into a dimer. The separation of the FRET  
 341 pair in a dimer is  $\sim 60 \text{ \AA}$ , according to the model. The upper panel depicts a cartoon of the  
 342 presumed FP-tagged dimer in the membrane.

343  
 344  
 345

346 ***Functional expression of AmH<sub>v</sub>1. Voltage-dependence and kinetics.***

347 The cDNA of AmH<sub>v</sub>1 was cloned in the pcDNA3 expression vector and transfected into  
348 HEK293 cells. Under whole-cell conditions we recorded large voltage-dependent outward  
349 currents. Figure 4A shows a family of such currents. The data suggest that these currents  
350 were carried mostly by protons, since the reversal potential, measured from a tail current  
351 protocol, closely followed the equilibrium potential for protons, as given by the Nernst  
352 equation (Figure 4B).

353 The voltage-dependence of channel gating was estimated from a fit of the normalized  
354 conductance vs. voltage to equation 1. The steepness of the curve corresponds to an apparent  
355 charge of  $\sim 2 e_0$ , comparable to other H<sub>v</sub>1's under similar recording conditions (Figure 4C).  
356 Interestingly, these channels seem to activate rapidly. This is apparent from the current  
357 traces, which reach a steady-state within a few hundred ms (Figure 4A), as quantified in  
358 Figure 4D. Equation 3 estimates two parameters, an activation time constant ( $\tau$ ) and a delay  
359 ( $\delta$ ). Both the time constant and the delay are similarly voltage-dependent at positive  
360 potentials. The existence of a delay in the time course implies that activation is a multiple  
361 state process. The delay magnitude is smaller than the time constant at all voltages, which  
362 can be interpreted to mean that the rate limiting step for opening comes late in the activation  
363 pathway (Schoppa and Sigworth, 1998).

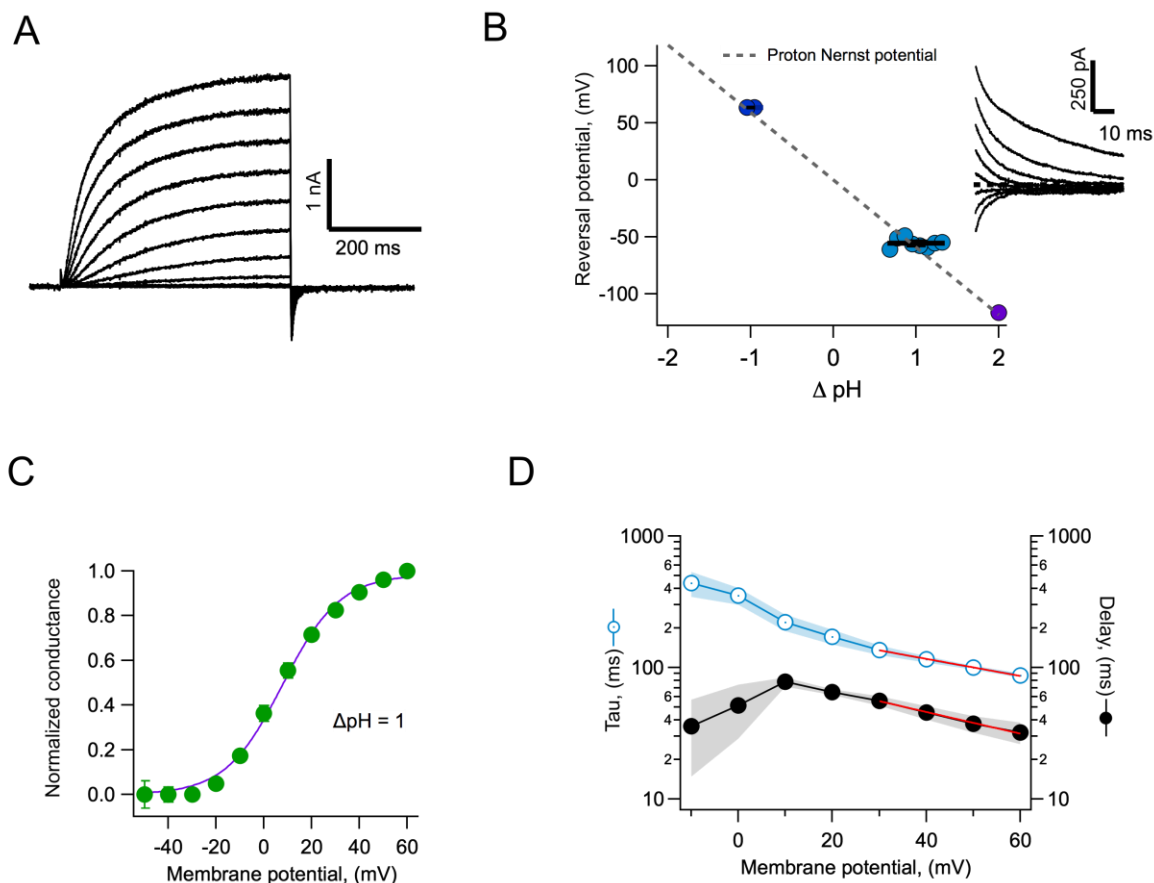

Figure 4

364  
 365 **Figure 4. Proton currents mediated by AmH<sub>v</sub>1 expressed in HEK 293 cells.** A) Typical  
 366 proton current family elicited by depolarizing pulses from -50 to 60 mV in 10 mV intervals.  
 367 The duration of the pulses is 500 ms. Linear current components have been subtracted. B)  
 368 Reversal potential of currents as a function of the pH gradient. Symbols are individual data  
 369 and the black horizontal lines are the mean. The dotted line is the expected reversal potential  
 370 as predicted by the Nernst equation. The inset shows a tail current family from which  
 371 instantaneous IV curves were extracted to measure the reversal potential. Recordings  
 372 shown in A and B were obtained in the whole-cell configuration. C) Normalized conductance-  
 373 voltage curve at  $\Delta$ pH = 1. The red curve is the fit to equation 1 with parameters  $V_{0.5} = 7.85$   
 374 mV,  $q = 2.09 e_0$ . Circles are the mean and error bars are the s.e.m. ( $n = 7$ ). D) Kinetic  
 375 parameters of activation. Activation time constant and delay estimated from fits of current  
 376 traces to equation 2. Circles are the mean and the s.e.m. is indicated by the shaded areas ( $n$   
 377 = 6). The voltage-dependence of the delay and tau of activation were estimated from a fit to



378 equation 3, which appears as the red curve. Parameters are:  $\delta(0) = 98.2$  ms,  $q_{\delta} = 0.47 e_0$ . The  
379 voltage-dependence parameters for tau are:  $\tau(0) = 212$  ms,  $q_{\tau} = 0.37 e_0$ .

380

### 381 ***Comparison to human H<sub>v</sub>1 channel properties.***

382 Human H<sub>v</sub>1 is probably the best characterized of the voltage-gated proton channels  
383 (Musset et al., 2008), so we compared some of the properties of AmH<sub>v</sub>1 with hH<sub>v</sub>1. AmH<sub>v</sub>1  
384 channels activate faster than their human counterpart. Figure 5 compares the activation  
385 kinetics of these two channels under the same conditions. Steady-state is apparently  
386 reached sooner after a voltage pulse in AmH<sub>v</sub>1 (Figure 5A) when compared to hH<sub>v</sub>1 (Figure  
387 5B). The slower kinetics of the human orthologue is also evidenced in the more sluggish  
388 deactivation tail currents (Figure 5B). The range of voltages over which activation happens  
389 is also different between the two channels, with the coral H<sub>v</sub>1 channel activating 40 mV  
390 more negative than the human clone (Figure 5C. Notice that the proton gradient is the same  
391 in these recordings). Even though AmH<sub>v</sub>1 activates at more negative voltages, the  
392 activation range is still more positive than the proton reversal potential, thus coral proton  
393 currents activated by depolarization, in the steady state and at least as expressed in  
394 HEK293 cells, are always outward.

395 The faster kinetics of AmH<sub>v</sub>1 is clearly evidenced when the time constant of activation,  $\tau$ ,  
396 estimated using fits of the activation time course to equation 2, is compared for coral and  
397 human H<sub>v</sub>1 channels. AmH<sub>v</sub>1 is almost 10-fold faster at 0 mV and over a range of positive  
398 voltages (Figure 5D).

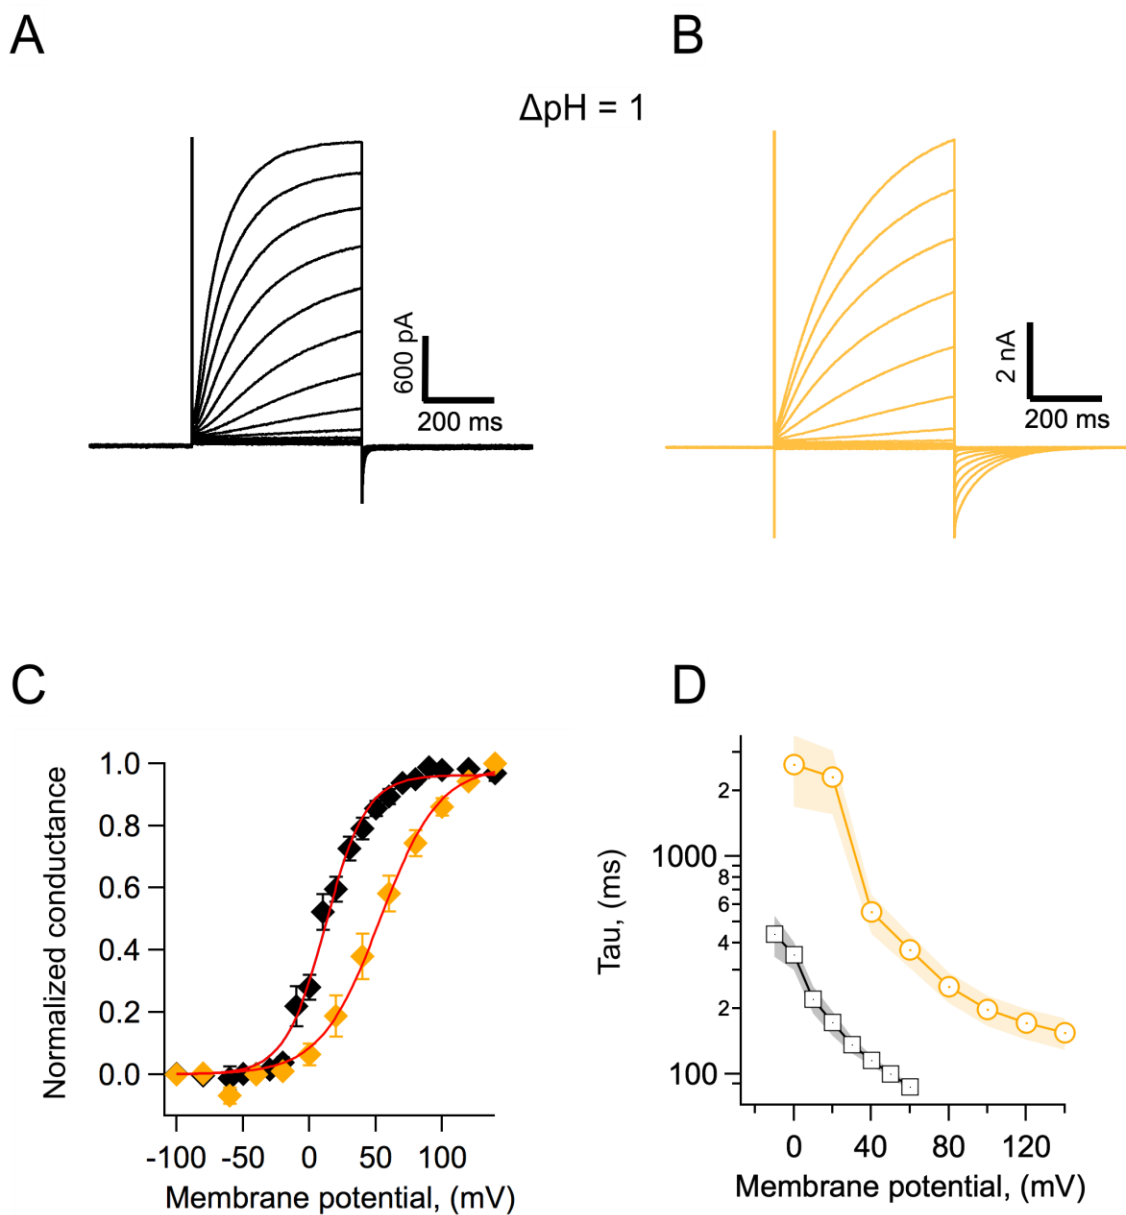

Figure 5

399  
400 **Figure 5. Coral H<sub>v</sub>1 channels are faster and activate more readily than their human**  
401 **counterpart.** A) AmH<sub>v</sub>1 currents in response to voltage-clamp pulses from -100 to 120 mV.  
402 B) Currents through hH<sub>v</sub>1 channels in response to voltage-clamp pulses from -100 to 120  
403 mV. Recordings shown in A and B were obtained in whole-cell the configuration. C)  
404 Comparison of the conductance-voltage relationship for both channels. Black diamonds are  
405 the mean  $G/G_{\max}$  for AmH<sub>v</sub>1 and yellow diamonds for hH<sub>v</sub>1. The error bars are the s.e.m. (n=

406 3, for both channels). The continuous red curves are fits to equation 1. The fitted parameters  
407 are:  $AmH_{v1}$ ,  $q = 1.62 e_0$ ,  $V_{0.5} = 12.2$  mV;  $hH_{v1}$ ,  $q = 1.11 e_0$ ,  $V_{0.5} = 53.1$  mV. D) The activation time  
408 constant estimated from fits of currents to equation 2. Circles are the mean for  $hH_{v1}$  and  
409 squares for  $AmH_{v1}$ . The shaded areas are the s.e.m. ( $n = 3$ , for both channels).

410

### 411 ***Effects of the pH gradient on gating***

412 Both native and cloned voltage-gated proton channels are characteristically modulated by  
413 the pH gradient (Cherny et al., 1995; Sasaki et al., 2006; Ramsey et al., 2006). We carried out  
414 experiments to investigate the modulation of the coral  $H_{v1}$  channels by different pH  
415 gradients. We first recorded whole-cell currents at various  $\Delta pH$  and estimated the voltage-  
416 dependence of the conductance. These G-V curves were fitted to equation 2 to obtain the  
417 voltage of half activation,  $V_{0.5}$  and apparent gating charge,  $q$ , that determines the steepness  
418 of the fit. As is the case with other  $H_{v1}$  channels, the  $V_{0.5}$  shifts to negative voltages when  $\Delta pH$   
419 is greater than 0 and to positive voltages when  $\Delta pH < 0$  (Figure 6A). When we plot the  $V_{0.5}$  as  
420 a function of  $\Delta pH$  the relationship seems to be mostly linear over the range of  $\Delta pH$  -1 to 2.  
421 This relationship is somewhat steeper than the generally observed  $-40$  mV/ $\Delta pH$  (Figure 6B).  
422 We tried to obtain recordings over an extended range of  $\Delta pH$  values. To this end, we  
423 performed inside-out recordings in which the composition of solutions can be better  
424 controlled, tend to be more stable and the size of currents is smaller. However, recordings  
425 were unstable at extreme pH values and we only managed to reliably extend the data to  $\Delta pH$   
426 of -2. Figure 6C shows the summary of the inside-out recordings. We have plotted both the  
427  $V_{0.5}$  and the threshold voltage,  $V_{Thr}$ . To obtain this last parameter, we fitted the exponential  
428 rise of the G-V curve to a function of the form:

$$429 \quad G(V) = G' \cdot \exp^{qV/K_B T}$$

430  $V_{Thr}$  was calculated as the voltage at which the fit reaches 10 % of the maximum conductance.  
431 The parameter  $V_{Thr}$  should be less sensitive than  $V_{0.5}$  to the possible change in the proton  
432 gradient that can occur with large currents. It is clear from these data that at extreme values  
433 the dependence of  $V_{0.5}$  or  $V_{Thr}$  on  $\Delta pH$  deviates from a simple linear relationship and instead  
434 it appears to saturate with increasing  $\Delta pH$ .

435

436

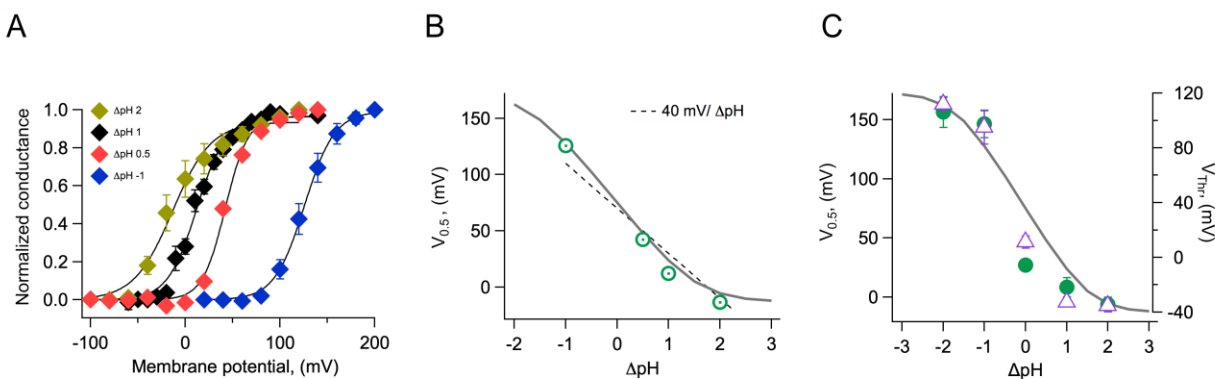

437

438

439 **Figure 6. Modulation of channel activation by the pH gradient.** A) Conductance vs.  
440 voltage relationships obtained at the indicated  $\Delta\text{pH}$  values, obtained from whole-cell  
441 recordings of AmH<sub>v</sub>1 proton currents. Continuous lines are fits to equation 1. B) The  
442 parameter  $V_{0.5}$  was obtained from the fits in A and is displayed as a function of  $\Delta\text{pH}$ . The  
443 dotted line is the 40 mV/ $\Delta\text{pH}$  linear relationship. The continuous grey curve is the prediction  
444 of the allosteric model. C) Parameters  $V_{0.5}$  (green circles) and  $V_{\text{Thr}}$  (purple triangles) obtained  
445 from a different set of inside-out current recordings. Data are mean  $\pm$  s.e.m. The continuous  
446 grey curve is the same prediction of the allosteric model shown in B. The model parameters  
447 used to generate the theoretical curve are:  $E=5 \times 10^5$ ,  $D=10^5$ ,  $C=0.0002$ ,  $K_v(0)=0.00005$ ,  
448  $q_g=1.0 e_0$ ,  $pK_o=3.4$ ,  $pK_i=7$ .

449

#### 450 ***Allosteric model of voltage and pH-dependent gating***

451 Currently, there are is only one quantitative model that has been used to explain  $\Delta\text{pH}$  gating  
452 of H<sub>v</sub>1 channels (Cherny et al., 1995). However, this model is euristic and does not provide  
453 mechanistic insight into the process of proton modulation of the voltage dependence of  
454 proton permeable channels. In order to explain the modulation of the range of activation by  
455 the proton gradient, parameterized by the  $V_{0.5}$ , we developed a structurally-inspired  
456 allosteric model of voltage and proton activation. As many voltage-sensing domains, H<sub>v</sub>1 has  
457 two water-occupied cavities exposed to the extracellular and intracellular media (Ramsey et  
458 al., 2010; Islas and Sigworth, 2001; Ahern and Horn, 2005). Recent evidence suggests that  
459 these cavities function as proton-binding sites through networks of electrostatic interactions

460 (De La Rosa et al., 2018). In our model, we propose that these two proton-binding sites, one  
461 intracellular and one extracellular, allosterically modulate the movement of the voltage-  
462 sensing S4 segment and thus channel activation in opposite ways. The extracellular site is  
463 postulated as inhibitory, while the intracellular site is excitatory, facilitating voltage sensor  
464 movement. As a first approximation, we employ a simplified allosteric formalism based on a  
465 Monod-Wyman-Changeux (MWC) style model (Horrigan and Aldrich, 2002; Changeux,  
466 2012). As a simplifying assumption, in this model we assume that the voltage sensor moves  
467 in a single voltage-dependent activation step. We assume the external and an internal  
468 proton-binding sites have simple protonation given by a single  $pK_a$  value. These sites operate  
469 as two allosteric modules and are coupled to the voltage sensor according to coupling factors  
470 C and D, respectively. These binding sites in turn interact with each other through the  
471 coupling factor E. The modular representations of the model are illustrated in Figure 7A,  
472 while the full model depicting all open and closed states with all permissible transitions and  
473 the corresponding equilibrium constants for each transition is shown in Figure 7B. Full  
474 details of equations derived from these schemes are given in supplementary data.  
475 This allosteric model represents a first attempt at producing a quantitative mechanistic  
476 understanding of the interaction of the voltage sensor and protons in  $H_v1$  channels.  
477 From the data shown in Figure 6C, it can be seen that the model is capable of reproducing  
478 the very steep dependence of  $V_{0.5}$  on  $\Delta pH$  and importantly, the saturation of this relationship  
479 at extreme values. Some  $H_v1$  channels from other organisms show a linear dependence of  
480 gating over a large range of  $\Delta pH$  values, while others show a reduced dependence and even  
481 saturation over some range of  $\Delta pH$  (Thomas et al., 2018). Our model can explain these  
482 different behaviors as different channels having distinct values of  $pK_a$ s for the internal or  
483 external sites, differences in coupling factors or differences in the voltage-dependent  
484 parameters (Figure6 -Supplement 1).  
485

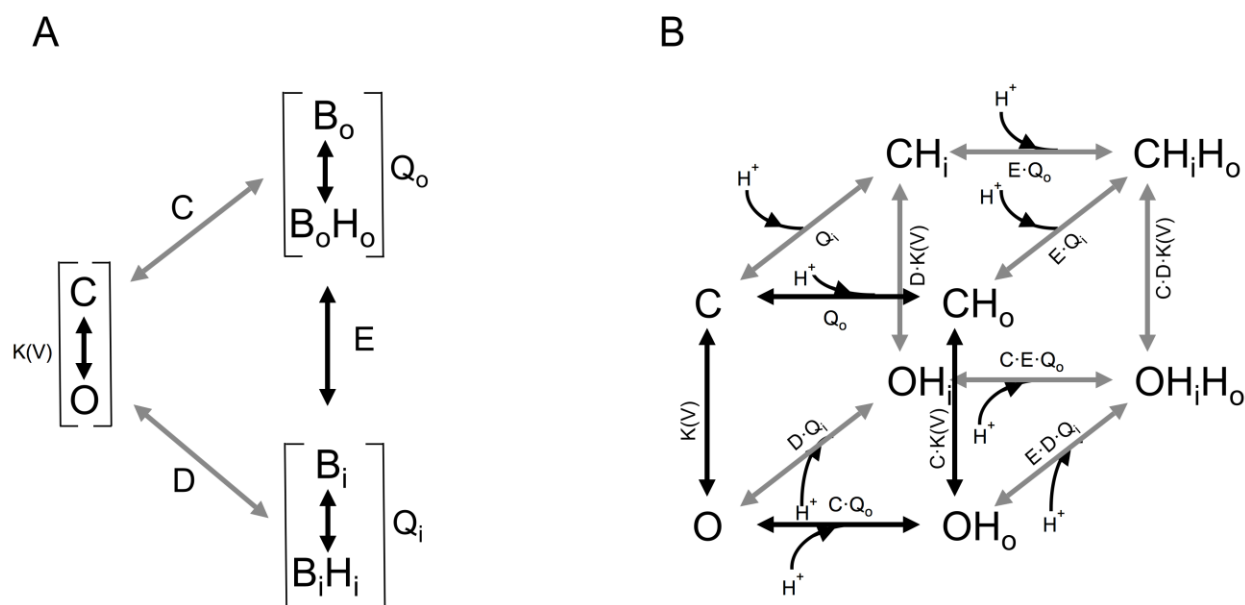

486

487 **Figure 7. Gating scheme I.** A) Modular representation of a simple MWC model; the channel  
 488 opening transition is voltage-dependent, with equilibrium constant  $K(V)$ .  $B_o$  and  $B_i$  are the  
 489 unbound states of the extracellular and intracellular proton-binding sites, respectively and  
 490  $B_oH_o$  and  $B_iH_i$  are the proton bound states of these binding sites.  $Q_o$  and  $Q_i$  are equilibrium  
 491 constants that depend on the  $pK_a$  of each of these binding states. C, D and E are the coupling  
 492 constants between each of the indicated modules. B) All the individual states implied in A  
 493 are depicted, along with proton-binding states and the appropriate equilibrium constants. C,  
 494 closed states, O, open states.  $OH_x$ ,  $OH_xH_x$  and  $CH_x$ ,  $CH_xH_x$  are single or doubly proton-occupied  
 495 states, where x can be o for outside or i for inside-facing binding sites.

496

497

#### 498 **Block by $Zn^{2+}$**

499 The best characterized blocker of proton channels is the divalent ion zinc (Cherny et al.,  
 500 2020; De La Rosa et al., 2018; Qiu et al., 2016). We performed experiments to determine if  
 501 Am  $H_v1$  channels are also inhibited by zinc. We found that indeed, extracellular application  
 502 of zinc in outside-out patches produced inhibition of the channels, reflected in reduced

503 current amplitude (Figure 8A). Figure 8B shows average current-voltage relationships in the  
504 absence and presence of 10  $\mu\text{M}$  external zinc. It can be seen that the fraction of current  
505 blocked is not the same at every voltage, indicating that this inhibition might be voltage-  
506 dependent. The fraction of blocked channels was calculated and is plotted at each voltage  
507 along with the I-V curves (Figure 8B). It can be clearly seen that inhibition by  $\text{Zn}^{2+}$  is voltage-  
508 dependent. A simple mechanism for voltage-dependent blockage was proposed by  
509 (Woodhull, 1973). This model postulates that a charged blocker molecule interacts with a  
510 binding site in the target molecule that is located within the electric field. Fitting the data  
511 according to this model, and given that zinc is a divalent ion, its apparent binding site is  
512 located at a fraction  $\delta = 0.2$  of the membrane electric field from the extracellular side (Figure  
513 8B).

514 Zinc blockage proceeds very fast. At 1 mM the channels are blocked almost instantaneously,  
515 and the inhibition washes off very fast as well (Figure 8C). Finally, we report the dose  
516 response curve (Figure 8D). The inhibition dose response curve can be fit by a Hill equation  
517 (Equation 4) with a slope factor of near 0.5 and an apparent dissociation constant,  $K_D$  of 27  
518  $\mu\text{M}$ .

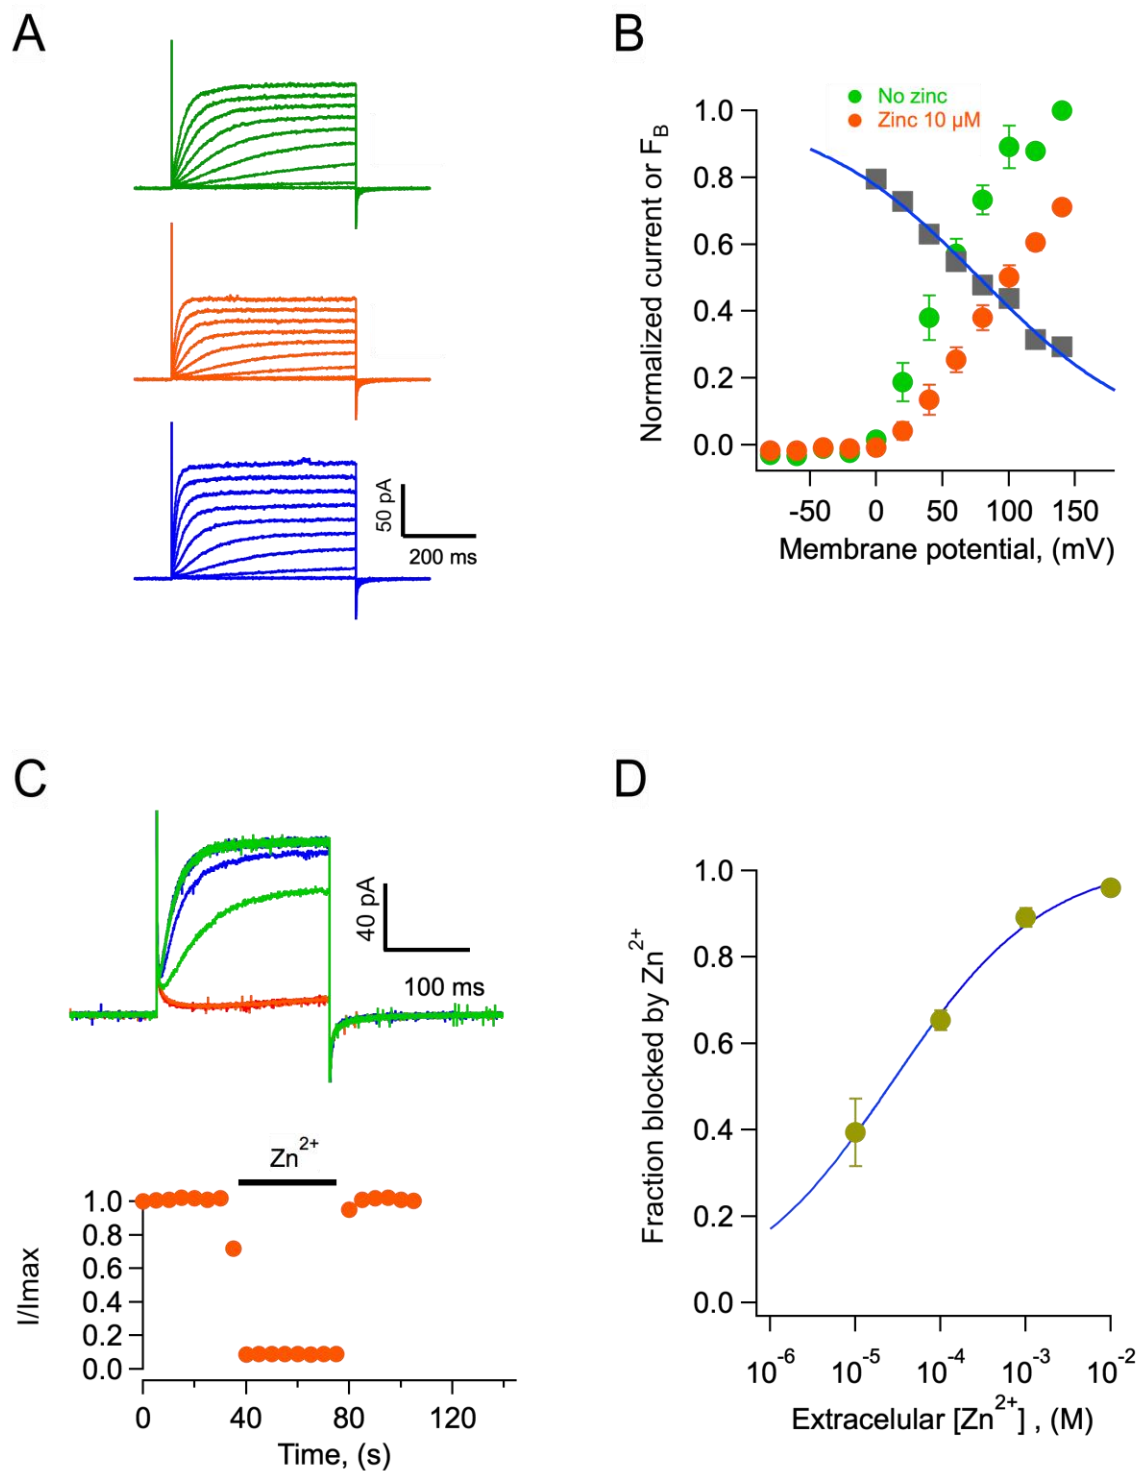

519

520 **Figure 8. Block of AmHv1 channels by extracellular zinc.** A) AmHv1-mediated currents  
521 from an outside-out patch in the absence (top), presence of 10 μM zinc (middle) and after  
522 washing of zinc (bottom). The scale bars apply to the three current families. B) Normalized  
523 current voltage relationships before and in the presence of 10 μM zinc from 4 patches as in



524 A. The grey squares are the ratio  $I_{\text{zinc}}(V)/I(V)$ , which gives the voltage-dependence of the  
525 blocking reaction. The blue curve is the fit to the Woodhull equation:

526 
$$F_B = \frac{1}{1 + e^{-\delta z(V - V_{0.5})/K_B T}}$$
, where  $F_B$  is the fraction of current blocked,  $\delta$  is the fraction of the

527 electric field where the blocker binds,  $z$  is the valence of the blocker,  $V_{0.5}$  is the potential  
528 where half of the current is blocked,  $K_B$  is Boltzmann's constant and  $T$  the temperature in  
529 Kelvin. The fitting parameters are:  $\delta=0.19$ ,  $V_{0.5}=77.6$  mV. C) The effect of zinc is fast.  
530 Application of 1 mM zinc to an outside-out patch produces almost instantaneous block of  
531 ~90 % of the current. The effect also washes off quickly upon removal of zinc. Trace colors  
532 are as in A. Voltage pulse was 100 mV applied every 5 sec. D) Dose-response curve of zinc  
533 block of AmHv1 obtained at 100 mV. The continuous curve is a fit of the data to equation 4  
534 with apparent  $K_D = 27.4$   $\mu\text{M}$  and  $n = 0.48$ .

535

536

### 537 **Discussion and conclusions**

538 A few ion transport mechanisms in reef-building corals have been described, but up to now,  
539 no ion channels have been characterized from any scleractinian species. Here we show that  
540 voltage-gated proton-permeable channels formed by the Hv1 protein are present in corals.  
541 In particular, we have cloned these channels from two species of the genus *Acropora*, *A.*  
542 *millepora* and *A. palmata*. It is interesting that the protein sequence of these proteins shows  
543 a very high degree of conservation, suggesting that, even when the two species are found in  
544 different oceans, they haven't had time to diverge substantially or alternatively, selective  
545 pressures on these channels are very similar in both species. The presence of Hv1 sequences  
546 in many other species of corals from disparate clades, suggest that Hv1 plays an important  
547 role in coral physiology.

548 Hv1 channels are formed by a protein fold that is structurally equivalent to the voltage-  
549 sensing domains (VSDs) of canonical voltage-gated channels (Sasaki et al., 2006; Ramsey et  
550 al., 2006). The VSD is formed by a bundle of four antiparallel alpha helices (Takeshita et al.,  
551 2014b). In some species, it has been shown that Hv1 channels are dimeric (Lee et al., 2008b;  
552 Mony et al., 2020; Lee et al., 2008a). Accordingly, we also show here that the AmHv1 is a

553 dimer. Our FRET results are consistent with the high propensity to form a coiled-coil shown  
554 by its C-terminal domain.

555 H<sub>v</sub>1 channels are different from canonical voltage-gated channels in that both voltage-  
556 sensing and permeation are mediated through a single protein domain. Voltage-sensing is  
557 thought to occur through the interaction of charged amino acid side chains with the electric  
558 field, leading to outward movement of the fourth domain or S4, in a similar fashion to other  
559 voltage-sensing domains (Carmona et al., 2018; De La Rosa and Ramsey, 2018). This outward  
560 movement of the S4 is coupled to protons moving through the VSD in a manner that is not  
561 completely understood (Randolph et al., 2016). Most proton permeable channels seem to  
562 have evolved to extrude protons from the cell, and towards this end, their voltage  
563 dependence is tightly modulated by the proton gradient between extracellular and  
564 intracellular solutions (Cherny et al., 1995).

565 Our electrophysiology experiments show that these coral channels give rise to proton  
566 currents when expressed in HEK293 cells and that they retain the functional characteristics  
567 that have been shown to define the class in other species, such as very high selectivity for  
568 protons, activation by voltage and modulation of this activation by the proton gradient. The  
569 new channels reported here activate faster than the human H<sub>v</sub>1 channel. It has been known  
570 that different orthologs of H<sub>v</sub>1 activate with varying kinetics. For example, sea urchin,  
571 dinoflagellate and recently, fungal H<sub>v</sub>1 channels activate rapidly, while most mammalian  
572 counterparts have slow activation rates (Musset et al., 2008; Smith et al., 2011; Zhao and  
573 Tombola, 2021). A comparative study suggests that two amino acids in the S3  
574 transmembrane segment are important determinants of kinetic differences between sea  
575 urchin and mouse H<sub>v</sub>1 (Sakata et al., 2016). The authors suggest that the time course of  
576 activation is slow in channels containing a histidine and a phenylalanine at positions 164 and  
577 166, respectively (mouse sequence numbering). The AmH<sub>v</sub>1 has a histidine at equivalent  
578 position 132 and a methionine at 134. It is possible that this last amino acid in AmH<sub>v</sub>1 confers  
579 most of the fast kinetics phenotype. A separate work showed that a lack of the amino-  
580 terminal segment in human sperm H<sub>v</sub>1 also produced fast-activating channels (Berger et al.,  
581 2017). Interestingly, the *Acropora* channels have a shorter amino-terminal sequence, which  
582 could also contribute to their fast kinetics.

583 One of the most interesting characteristics found in these new proton channels is their  
584 modulation by the proton gradient. As opposed to other  $H_v1$  channels, we can observe a  
585 trend towards saturation of the  $V_{0.5}$  for activation as a function of  $\Delta pH$  at extreme values of  
586 this variable. A tendency towards saturation of the  $V_{0.5}$ - $\Delta pH$  relationship has been observed  
587 in mutants of the  $hH_v1$  channel (Cherny et al., 2015) or at negative values of  $\Delta pH$  for a snail  
588  $H_v1$  (Thomas et al., 2018), but it seems it can be fully appreciated in  $AmH_v1$ . Since our model  
589 explains the observation of saturation of voltage gating at extreme values of  $\Delta pH$  as a  
590 consequence of the existence of two saturable sites for proton binding, we attribute this  
591 behavior, to the large separation of  $pK_a$  values for the extracellular and intracellular proton  
592 binding sites.

593 The strength of allosteric coupling of these sites and the voltage sensor will determine if  
594 saturation is observed over a short or extended range of  $\Delta pH$  values and the range of values  
595 of  $V_{0.5}$  that a particular channel can visit. Our model should provide a framework to better  
596 understand gating mechanisms in future work.

597 It is clear that more complicated models, with a larger number of voltage dependent and  
598 independent steps (Villalba-Galea, 2014) and coupling to protonation sites should be the  
599 next step to improve data fitting and explore voltage-and proton-dependent kinetics. In  
600 particular, these types of models can help explain mutagenesis experiments exploring the  
601 nature of the protonation sites.

602  $H_v1$  proton channels seem fundamental in handling fluctuations in intracellular pH and take  
603 part in several well-characterized physiological processes that depend on proton  
604 concentration changes, such as intracellular pH regulation, sperm flagellum beating, reactive  
605 oxygen species production and bacterial killing in immune cells, initiation of  
606 bioluminescence in single-celled algae, etc. (Castillo et al., 2015).

607 What is the function of voltage-gated proton channels in corals? The deposition of a  $CaCO_3$   
608 exoskeleton is one of the main defining characteristics of scleractinians, however, the ionic  
609 transport mechanisms involved in this process are mostly unknown. In order for aragonite  
610 precipitation to occur favorably, the pH of the calicoblastic fluid, right next to the skeleton is  
611 maintained at high levels, between 8.5 and 9 and above the pH of sea water (Le Goff et al.,  
612 2017). It has been posited that corals control this pH via vectorial transport of protons to the

613 gastrodermal cavity (Jokiel, 2013). Since proton transport away from the site of calcification  
614 would incur a drastically lower intracellular pH in the cells of the aboral region, we propose  
615 that, given their ability to rapidly regulate intracellular pH (De la Rosa et al., 2016), H<sub>v</sub>1  
616 proton channels contribute by transporting protons from the cells. Thus, these proton  
617 channels would be a major component of the mechanisms of intracellular pH regulation.  
618 Given that the activation range of H<sub>v</sub>1 is controlled by the pH gradient, a large intracellular  
619 acidification would facilitate opening of these channels at the resting potential of cells, which  
620 is presumably negative.

621 The finding that coral H<sub>v</sub>1 channels retain their sensitivity to Zn<sup>2+</sup>, opens the possibility of  
622 using this ion as a pharmacological tool to study the role of proton channels in pH  
623 homeostasis. It is interesting that a recent report has shown detrimental effects of zinc  
624 supplementation in coral growth (Tijssen et al., 2017), a result that could be explained by  
625 zinc inhibition of H<sub>v</sub>1.

626 The physiological role of H<sub>v</sub>1 channels in corals might be essential in the response of these  
627 organisms to ocean acidification. We theorize that as the pH of sea water acidifies, gating of  
628 H<sub>v</sub>1 should require stronger depolarization, thus hindering its capacity to transport protons  
629 from the cell. This will contribute to a diminished calcification rate and less aragonite  
630 saturation of the CaCO<sub>3</sub> skeleton. It would be interesting and important to study the effects  
631 of acidification on H<sub>v</sub>1 physiology and pH regulation in corals in vivo. Essentially nothing is  
632 known about the electrophysiological properties of coral cells. This report represents the  
633 first time that an ion channel has been cloned and characterized in any coral and should open  
634 a new avenue of research, such as uncovering the cellular and possible subcellular  
635 localization of these channels and carefully measuring their physiological role in vivo.

636

637  
638 **Acknowledgments.** We would like to thank Alejandra Llorente for excellent technical  
639 assistance. This work was funded in part by grant No. IN215621 from DGAPA-PAPIIT-UNAM  
640 to L.D.I., grant No. 247765 to A.T.B. and grant No. IN200720 to T.R. EM was funded by  
641 Conacyt-Fronteras en la Ciencia Grant No. 2.

642 Author contributions. G.R-Y, performed cloning, performed heterologous expression,  
643 performed experiments, read the paper. C.C., M.A.C.-R., E.S-D., performed cloning, expression

644 and electrophysiology and FRET experiments. L.D.I. obtained funding, conceived research,  
645 procured animals, analyzed data, wrote the paper. A.B. and E.M. procured collection permits  
646 and specimens, performed RNA extraction, revised and edited the paper. I.S.R. contributed  
647 ideas, revised and edited the paper. T.R. analyzed data, wrote and edited the paper,  
648 contributed ideas.

649  
650  
651

## References

- 652 Ahern, C.A., and R. Horn. 2005. Focused electric field across the voltage sensor of potassium  
653 channels. *Neuron*. 48:25–29.
- 654 Allemand, D., É. Tambutté, D. Zoccola, and S. Tambutté. 2011. Coral calcification, cells to  
655 reefs. *Coral Reefs Ecosyst. Transit*. 119–150.
- 656 Berger, T.K., D.M. Fußhöller, N. Goodwin, W. Bönigk, A. Müller, N. Dokani Khesroshahi, C.  
657 Brenker, D. Wachten, E. Krause, and U.B. Kaupp. 2017. Post-translational cleavage of  
658 Hv1 in human sperm tunes pH- and voltage-dependent gating. *J. Physiol*. 595:1533–  
659 1546.
- 660 Caldeira, K., and M.E. Wickett. 2003. Anthropogenic carbon and ocean pH. *Nature*. 425:365–  
661 365.
- 662 Capasso, L., P. Ganot, V. Planas-Bielsa, S. Tambutté, and D. Zoccola. 2021. Intracellular pH  
663 regulation: characterization and functional investigation of H<sup>+</sup> transporters in  
664 *Stylophora pistillata*. *BMC Mol. Cell Biol*. 22:1–19.
- 665 Carmona, E.M., H.P. Larsson, A. Neely, O. Alvarez, R. Latorre, and C. Gonzalez. 2018. Gating  
666 charge displacement in a monomeric voltage-gated proton (H<sub>v</sub>1) channel. *Proc.*  
667 *Natl. Acad. Sci*. 115:9240–9245. doi:10.1073/pnas.1809705115.
- 668 Castillo, K., A. Pupo, D. Baez-Nieto, G.F. Contreras, F.J. Morera, A. Neely, R. Latorre, and C.  
669 Gonzalez. 2015. Voltage-gated proton (Hv1) channels, a singular voltage sensing  
670 domain. *FEBS Lett*. 589:3471–3478.
- 671 Changeux, J.-P. 2012. Allosterity and the Monod-Wyman-Changeux model after 50 years.  
672 *Annu. Rev. Biophys*. 41:103–133.
- 673 Cherny, V.V., V.S. Markin, and T.E. DeCoursey. 1995. The voltage-activated hydrogen ion  
674 conductance in rat alveolar epithelial cells is determined by the pH gradient. *J. Gen.*  
675 *Physiol*. 105:861–896.
- 676 Cherny, V.V., D. Morgan, B. Musset, G. Chaves, S.M. Smith, and T.E. DeCoursey. 2015.  
677 Tryptophan 207 is crucial to the unique properties of the human voltage-gated  
678 proton channel, hHV1. *J. Gen. Physiol*. 146:343–356.

- 679 Cherny, V.V., B. Musset, D. Morgan, S. Thomas, S.M. Smith, and T.E. DeCoursey. 2020.  
680 Engineered high-affinity zinc binding site reveals gating configurations of a human  
681 proton channel. *J. Gen. Physiol.* 152.
- 682 Chomczynski, P., and N. Sacchi. 1987. Single-step method of RNA isolation by acid  
683 guanidinium thiocyanate-phenol-chloroform extraction. *Anal. Biochem.* 162:156–  
684 159.
- 685 Cleves, P.A., M.E. Strader, L.K. Bay, J.R. Pringle, and M.V. Matz. 2018. CRISPR/Cas9-mediated  
686 genome editing in a reef-building coral. *Proc. Natl. Acad. Sci.* 115:5235–5240.
- 687 De La Rosa, V., A.L. Bennett, and I.S. Ramsey. 2018. Coupling between an electrostatic  
688 network and the Zn<sup>2+</sup> binding site modulates Hv1 activation. *J. Gen. Physiol.*  
689 150:863–881.
- 690 De La Rosa, V., and I.S. Ramsey. 2018. Gating currents in the Hv1 proton channel. *Biophys. J.*  
691 114:2844–2854.
- 692 De la Rosa, V., E. Suárez-Delgado, G.E. Rangel-Yescas, and L.D. Islas. 2016. Currents through  
693 Hv1 channels deplete protons in their vicinity. *J. Gen. Physiol.* 147:127–136.
- 694 DeCoursey, T.E. 2013. Voltage-gated proton channels: molecular biology, physiology, and  
695 pathophysiology of the HV family. *Physiol. Rev.* 93:599–652.
- 696 De-la-Rosa, V., G.E. Rangel-Yescas, E. Ladrón-de-Guevara, T. Rosenbaum, and L.D. Islas.  
697 2013. Coarse Architecture of the Transient Receptor Potential Vanilloid 1 (TRPV1)  
698 Ion Channel Determined by Fluorescence Resonance Energy Transfer. *J. Biol. Chem.*  
699 288:29506–29517. doi:10.1074/jbc.M113.479618.
- 700 Edelstein, A.D., M.A. Tsuchida, N. Amodaj, H. Pinkard, R.D. Vale, and N. Stuurman. 2014.  
701 Advanced methods of microscope control using  $\mu$ Manager software. *J. Biol. Methods.*  
702 1.
- 703 Halaszovich, C.R., M.G. Leitner, A. Mavrantoni, A. Le, L. Frezza, A. Feuer, D.N. Schreiber, C.A.  
704 Villalba-Galea, and D. Oliver. 2012. A human phospholipid phosphatase activated by  
705 a transmembrane control module. *J. Lipid Res.* 53:2266–2274.
- 706 Hoegh-Guldberg, O. 1999. Climate change, coral bleaching and the future of the world's  
707 coral reefs. *Mar. Freshw. Res.* 50:839–866.
- 708 Horrigan, F.T., and R.W. Aldrich. 2002. Coupling between voltage sensor activation, Ca<sup>2+</sup>  
709 binding and channel opening in large conductance (BK) potassium channels. *J. Gen.*  
710 *Physiol.* 120:267–305.
- 711 Islas, L.D., and F.J. Sigworth. 2001. Electrostatics and the gating pore of Shaker potassium  
712 channels. *J. Gen. Physiol.* 117:69–90.

- 713 Iwasaki, H., Y. Murata, Y. Kim, M.I. Hossain, C.A. Worby, J.E. Dixon, T. McCormack, T. Sasaki,  
714 and Y. Okamura. 2008. A voltage-sensing phosphatase, Ci-VSP, which shares  
715 sequence identity with PTEN, dephosphorylates phosphatidylinositol 4, 5-  
716 bisphosphate. *Proc. Natl. Acad. Sci.* 105:7970–7975.
- 717 Jokieli, P.L. 2013. Coral reef calcification: carbonate, bicarbonate and proton flux under  
718 conditions of increasing ocean acidification. *Proc. R. Soc. B Biol. Sci.* 280:20130031.
- 719 Le Goff, C., E. Tambutté, A.A. Venn, N. Techer, D. Allemand, and S. Tambutté. 2017. In vivo  
720 pH measurement at the site of calcification in an octocoral. *Sci. Rep.* 7:1–14.
- 721 Lee, S.-Y., J.A. Letts, and R. MacKinnon. 2008a. Dimeric subunit stoichiometry of the human  
722 voltage-dependent proton channel Hv1. *Proc. Natl. Acad. Sci.* 105:7692–7695.
- 723 Lee, S.-Y., J.A. Letts, and R. MacKinnon. 2008b. Dimeric subunit stoichiometry of the human  
724 voltage-dependent proton channel Hv1. *Proc. Natl. Acad. Sci.* 105:7692–7695.  
725 doi:10.1073/pnas.0803277105.
- 726 Lishko, P.V., and Y. Kirichok. 2010. The role of Hv1 and CatSper channels in sperm  
727 activation. *J. Physiol.* 588:4667–4672.
- 728 Long, S.B., E.B. Campbell, and R. MacKinnon. 2005. Crystal structure of a mammalian  
729 voltage-dependent Shaker family K<sup>+</sup> channel. *Science.* 309:897–903.
- 730 Lupas, A., M. Van Dyke, and J. Stock. 1991. Predicting coiled coils from protein sequences.  
731 *Science.* 1162–1164.
- 732 McDonnell, A.V., T. Jiang, A.E. Keating, and B. Berger. 2006. Paircoil2: improved prediction  
733 of coiled coils from sequence. *Bioinformatics.* 22:356–358.
- 734 Mony, L., D. Stroebel, and E.Y. Isacoff. 2020. Dimer interaction in the Hv1 proton channel.  
735 *Proc. Natl. Acad. Sci.* 117:20898–20907. doi:10.1073/pnas.2010032117.
- 736 Moya, A., L. Huisman, E.E. Ball, D.C. Hayward, L.C. Grasso, C.M. Chua, H.N. Woo, J.-P. Gattuso,  
737 S. Foret, and D.J. Miller. 2012. Whole transcriptome analysis of the coral *Acropora*  
738 *millepora* reveals complex responses to CO<sub>2</sub>-driven acidification during the  
739 initiation of calcification. *Mol. Ecol.* 21:2440–2454.
- 740 Musset, B., V.V. Cherny, D. Morgan, Y. Okamura, I.S. Ramsey, D.E. Clapham, and T.E.  
741 DeCoursey. 2008. Detailed comparison of expressed and native voltage-gated  
742 proton channel currents. *J. Physiol.* 586:2477–2486.
- 743 Papp, F., S. Lomash, O. Szilagyi, E. Babikow, J. Smith, T.-H. Chang, M.I. Bahamonde, G.E.S.  
744 Toombes, and K.J. Swartz. 2019. TMEM266 is a functional voltage sensor regulated  
745 by extracellular Zn<sup>2+</sup>. *Elife.* 8:e42372.

- 746 Qiu, F., A. Chamberlin, B.M. Watkins, A. Ionescu, M.E. Perez, R. Barro-Soria, C. González, S.Y.  
747 Noskov, and H.P. Larsson. 2016. Molecular mechanism of Zn<sup>2+</sup> inhibition of a  
748 voltage-gated proton channel. *Proc. Natl. Acad. Sci.* 113:E5962–E5971.
- 749 Ramsey, I.S., Y. Mokrab, I. Carvacho, Z.A. Sands, M.S. Sansom, and D.E. Clapham. 2010. An  
750 aqueous H<sup>+</sup> permeation pathway in the voltage-gated proton channel Hv1. *Nat.*  
751 *Struct. Mol. Biol.* 17:869.
- 752 Ramsey, I.S., M.M. Moran, J.A. Chong, and D.E. Clapham. 2006. A voltage-gated proton-  
753 selective channel lacking the pore domain. *Nature.* 440:1213–1216.
- 754 Randolph, A.L., Y. Mokrab, A.L. Bennett, M.S. Sansom, and I.S. Ramsey. 2016. Proton  
755 currents constrain structural models of voltage sensor activation. *Elife.* 5:e18017.
- 756 Sakata, S., N. Miyawaki, T.J. McCormack, H. Arima, A. Kawanabe, N. Özkucur, T. Kurokawa, Y.  
757 Jinno, Y. Fujiwara, and Y. Okamura. 2016. Comparison between mouse and sea  
758 urchin orthologs of voltage-gated proton channel suggests role of S3 segment in  
759 activation gating. *Biochim. Biophys. Acta BBA-Biomembr.* 1858:2972–2983.
- 760 Sasaki, M., M. Takagi, and Y. Okamura. 2006. A voltage sensor-domain protein is a voltage-  
761 gated proton channel. *Science.* 312:589–592.
- 762 Schoppa, N.E., and F.J. Sigworth. 1998. Activation of Shaker potassium channels: I.  
763 Characterization of voltage-dependent transitions. *J. Gen. Physiol.* 111:271–294.
- 764 Smith, S.M.E., D. Morgan, B. Musset, V.V. Cherny, A.R. Place, J.W. Hastings, and T.E.  
765 DeCoursey. 2011. Voltage-gated proton channel in a dinoflagellate. *Proc. Natl. Acad.*  
766 *Sci.* 108:18162–18167. doi:10.1073/pnas.1115405108.
- 767 Takeshita, K., S. Sakata, E. Yamashita, Y. Fujiwara, A. Kawanabe, T. Kurokawa, Y. Okochi, M.  
768 Matsuda, H. Narita, and Y. Okamura. 2014a. X-ray crystal structure of voltage-gated  
769 proton channel. *Nat. Struct. Mol. Biol.* 21:352–357.
- 770 Takeshita, K., S. Sakata, E. Yamashita, Y. Fujiwara, A. Kawanabe, T. Kurokawa, Y. Okochi, M.  
771 Matsuda, H. Narita, Y. Okamura, and A. Nakagawa. 2014b. X-ray crystal structure of  
772 voltage-gated proton channel. *Nat. Struct. Mol. Biol.* 21:352–357.  
773 doi:10.1038/nsmb.2783.
- 774 Taylor, A.R., A. Chrachri, G. Wheeler, H. Goddard, and C. Brownlee. 2011. A voltage-gated H<sup>+</sup>  
775 channel underlying pH homeostasis in calcifying coccolithophores. *PLoS Biol.*  
776 9:e1001085.
- 777 Thomas, S., V.V. Cherny, D. Morgan, L.R. Artinian, V. Rehder, S.M. Smith, and T.E. DeCoursey.  
778 2018. Exotic properties of a voltage-gated proton channel from the snail *Helisoma*  
779 *trivolis*. *J. Gen. Physiol.* 150:835–850.



- 780 Tijssen, J., T. Wijgerde, M.C. Leal, and R. Osinga. 2017. Effects of zinc supplementation on  
781 growth and colouration of the scleractinian coral *Stylophora pistillata*. PeerJ  
782 Preprints.
- 783 Toyofuku, T., M.Y. Matsuo, L.J. De Nooijer, Y. Nagai, S. Kawada, K. Fujita, G.-J. Reichart, H.  
784 Nomaki, M. Tsuchiya, and H. Sakaguchi. 2017. Proton pumping accompanies  
785 calcification in foraminifera. *Nat. Commun.* 8:1–6.
- 786 Tresguerres, M., K.L. Barott, M.E. Barron, D.D. Deheyn, D.I. Kline, and L.B. Linsmayer. 2017.  
787 Cell biology of reef-building corals: ion transport, acid/base regulation, and energy  
788 metabolism. *Acid-Base Balance Nitrogen Excretion Invertebr.* 193–218.
- 789 Venn, A.A., E. Tambutte, S. Lotto, D. Zoccola, D. Allemand, and S. Tambutte. 2009. Imaging  
790 intracellular pH in a reef coral and symbiotic anemone. *Proc. Natl. Acad. Sci.*  
791 106:16574–16579.
- 792 Villalba-Galea, C.A. 2014. Hv1 proton channel opening is preceded by a voltage-  
793 independent transition. *Biophys. J.* 107:1564–1572.
- 794 Waterhouse, A., M. Bertoni, S. Bienert, G. Studer, G. Tauriello, R. Gumienny, F.T. Heer, T.A.P.  
795 de Beer, C. Rempfer, and L. Bordoli. 2018. SWISS-MODEL: homology modelling of  
796 protein structures and complexes. *Nucleic Acids Res.* 46:W296–W303.
- 797 Woodhull, A.M. 1973. Ionic blockage of sodium channels in nerve. *J. Gen. Physiol.* 61:687–  
798 708.
- 799 Ying, H., D.C. Hayward, I. Cooke, W. Wang, A. Moya, K.R. Siemering, S. Sprungala, E.E. Ball, S.  
800 Forêt, and D.J. Miller. 2019. The whole-genome sequence of the coral *Acropora*  
801 *millepora*. *Genome Biol. Evol.* 11:1374–1379.
- 802 Zhao, C., and F. Tombola. 2021. Voltage-gated proton channels from fungi highlight role of  
803 peripheral regions in channel activation. *Commun. Biol.* 4:1–13.
- 804 Zheng, J., M.C. Trudeau, and W.N. Zagotta. 2002. Rod Cyclic Nucleotide-Gated Channels Have  
805 a Stoichiometry of Three CNGA1 Subunits and One CNGB1 Subunit. *Neuron.* 36:891–  
806 896. doi:10.1016/S0896-6273(02)01099-1.
- 807
- 808
- 809
- 810
- 811
- 812
- 813

814 **Table 1.**

| Oligo name      | Sequence                                 |
|-----------------|------------------------------------------|
| <u>AcHvNt5'</u> | ATGATTGATGCAAGAACCAGACGATCGAGCATGGATGAT  |
| <u>AcHvNt3'</u> | TGATCCTGCTCTCAAGTCAAGAACCAACTCAGCAATGAC  |
| <u>AcHvCt5'</u> | ATGGGATTCACATTTTCAAGCACAAATGGAGGTGTTT    |
| <u>AcHvCt3'</u> | TCAGCTTTGTTTTAATGTTGTCAATTCAGACTCCAACCTG |

815 Oligonucleotides used to clone amino and carboxy terminal partial sequences of AmH<sub>v</sub>1 from  
816 total reverse-transcribed mRNA from *A. millepora*.

817  
818  
819  
820  
821  
822  
823  
824  
825  
826  
827  
828  
829  
830  
831  
832  
833  
834  
835  
836  
837  
838

839 **Supplementary materials.**

**A**

```

Ap MIDARTRRSSMDDQLPADELKEMGQPGTTAAVMASVCLTEDDTECPANKNHREKLNELL
Am MIDARTRRSSMDDQLPADELKEMGQPGTTAAVMASVCLTEDDTECPANKNHREKLNELL
*****

Ap HGDKIQYAIIVVLVIIDIIIVIAELVLDLRAGSEHHDNSASHVLHYISIAILSVFMIELL
Am HGDKIQYAIIVVLVIIDIIIVIAELVLDLRAGSEHHDNSASHVLHYISIAILSVFMIELL
*****

Ap KIYAMGFTFFKHKMEVFDGFVIIVSFALDIAFSNEQGGVDGVSLIVLLRLWRVTRIVNGI
Am KIYAMGFTFFKHKMEVFDGFVIIVSFALDIAFSNEQGGVDGVSLIVLLRLWRVTRIVNGI
*****

Ap ILSVQMRARERKVQAVTKENAELEQLKSKCAQLESELTTLKQS
Am ILSVQMRARERKVQAVTKENAELEQLKSKCAQLESELTTLKQS
*****

```

**B**

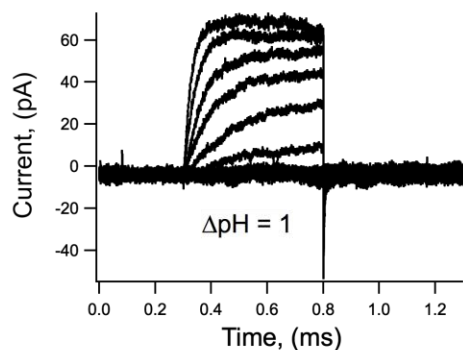

**C**

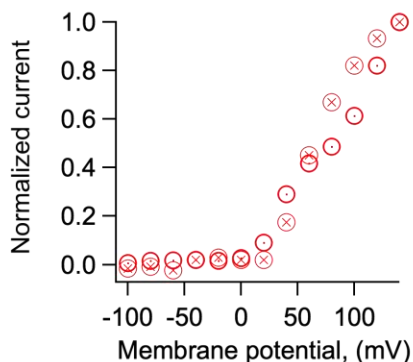

Figure 1- Supplement 1

840  
 841  
 842 **Figure 1- Supplement 1.** Some characteristics of the H<sub>v</sub>1 from *Acropora palmata*. A)  
 843 Comparison of the amino acid sequence of H<sub>v</sub>1s from *Acropora millepora* (Am) and *Acropora*  
 844 *palmata* (Ap). The asterisks bellow each residue indicate identity. B) Currents elicited from  
 845 an inside-out patch obtained from a HEK293 cell expressing ApH<sub>v</sub>1. Voltage pulses were  
 846 from -100 to 140 mV in 20 mV steps. The  $\Delta\text{pH}$  was 1. C) Normalized current-voltage  
 847 relationships of two patches obtained as in B.

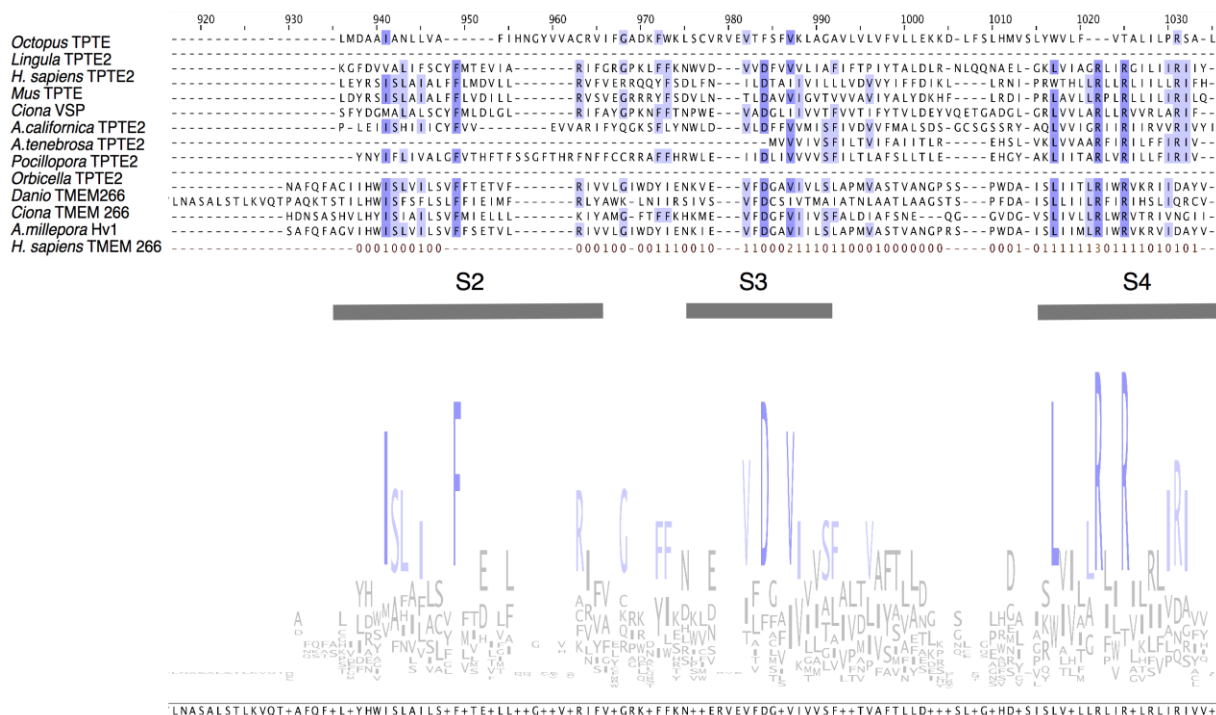

848  
849 **Figure 1- Supplement 2.** Comparison of the sequence of AmHv1 to other voltage-sensing  
850 proteins. Voltage-sensing phosphatases live CiVSP, TPTE and TPTE2 membrane proteins  
851 contain a voltage-sensing domain (VSD). Other proteins such as TMEM 266 also contain  
852 VSDs. Sequence similarity can be detected in the putative transmembrane domains. We show  
853 the sequence alignment of the region with highest similarity between the selected sequences  
854 of diverse organisms. The logo consensus sequence shows conservation, specially of the S4  
855 segment. Other amino acid residues common in VSDs are also conserved in S2 and S3.  
856 However, TPTE and TMEM266 proteins are very different from *Acropora millepora* Hv1.  
857

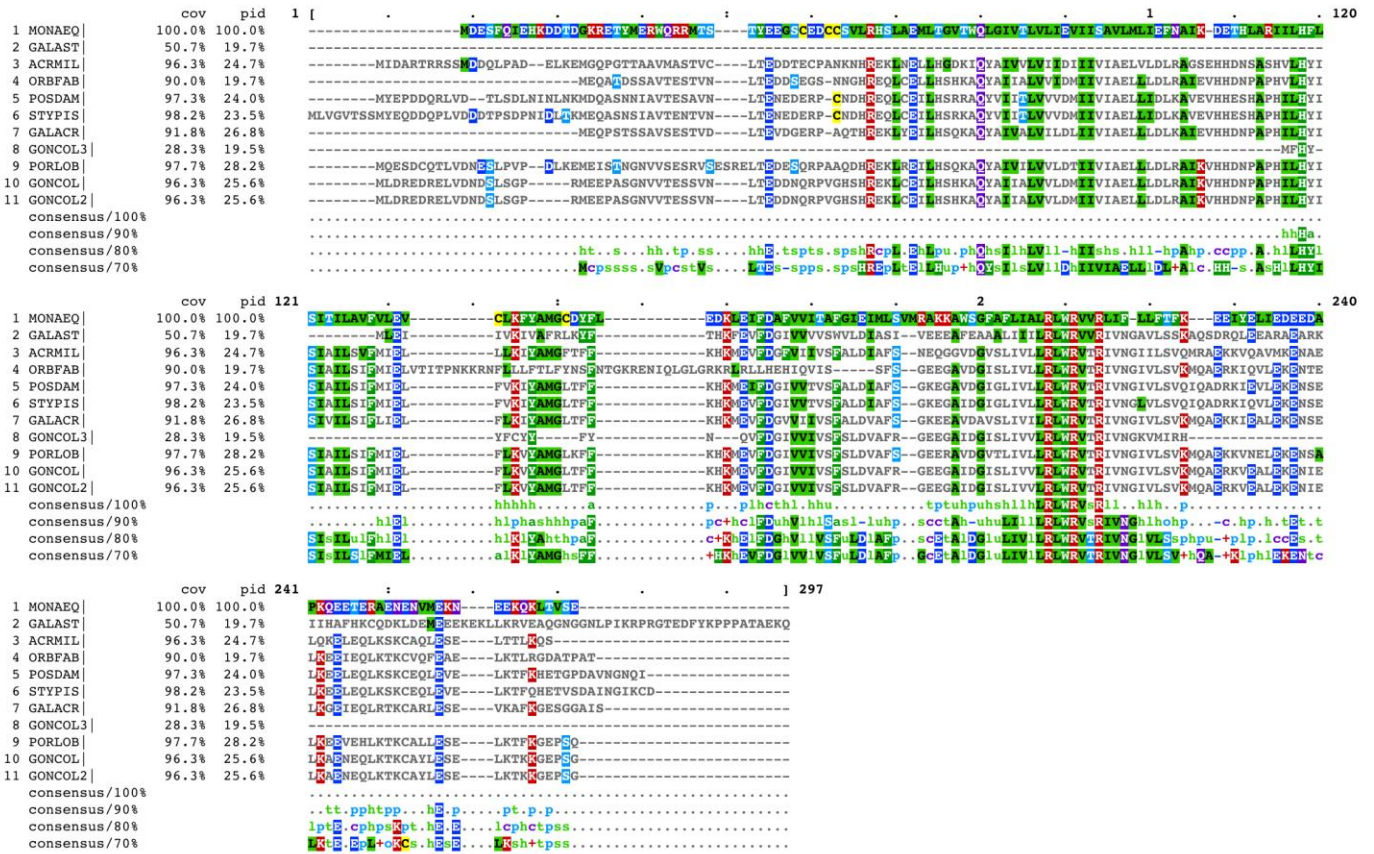

858

859

860 **Figure 2-Supplement 1.** Comparison of the AmH<sub>v</sub>1 protein sequence with similar  
 861 sequences found in other coral species. MONAEQ: *Montastrea*. GALAST: *Galastrea*. ACRMIL:  
 862 *Acropora millepora*. ORBFAB: *Orbicela faveolata*. POSDAM: *Posillopora damicornis*. STYPIS:  
 863 *Stylophora pistilata*. GALACR: *Galaxea*. GONCOL: *Goniopora*. PORLOB: *Porites lobata*.

864

865

866 **Figure 6- Supplement 1. Model equations and simulations.**

867

868 The full complement of discrete states in our model is shown in Figure 7B. This allosteric  
 869 model predicts that the open probability,  $P(V, pH)$  is dependent on voltage and pH according  
 870 to the following equations:

871

$$P(V, pH) = \frac{K_V \Omega}{K_V \Omega + \Gamma}$$

872

873 Where:  $\Omega = 1 + Q_o C + Q_i D + Q_o Q_i iDEC$

874  $\Gamma = 1 + Q_o + Q_i + Q_o Q_i iE$

875  $K(V) = K(0) \cdot e^{(q_g V / K_B T)}$

876  $Q_o = \frac{1}{1 + 10^{(pH_o - pK_o)}}$

877  $Q_i = \frac{1}{1 + 10^{(pH_i - pK_i)}}$

878 The voltage of half activation is given by:

879  $V_{0.5} = \frac{K_B T}{q_g} \cdot \ln \left( \frac{\Gamma}{K(0) \cdot \Omega} \right)$

880  $pK_o$  and  $pK_i$  are the  $pK_a$  values of the extracellular and intracellular proton binding sites,  
881 respectively.

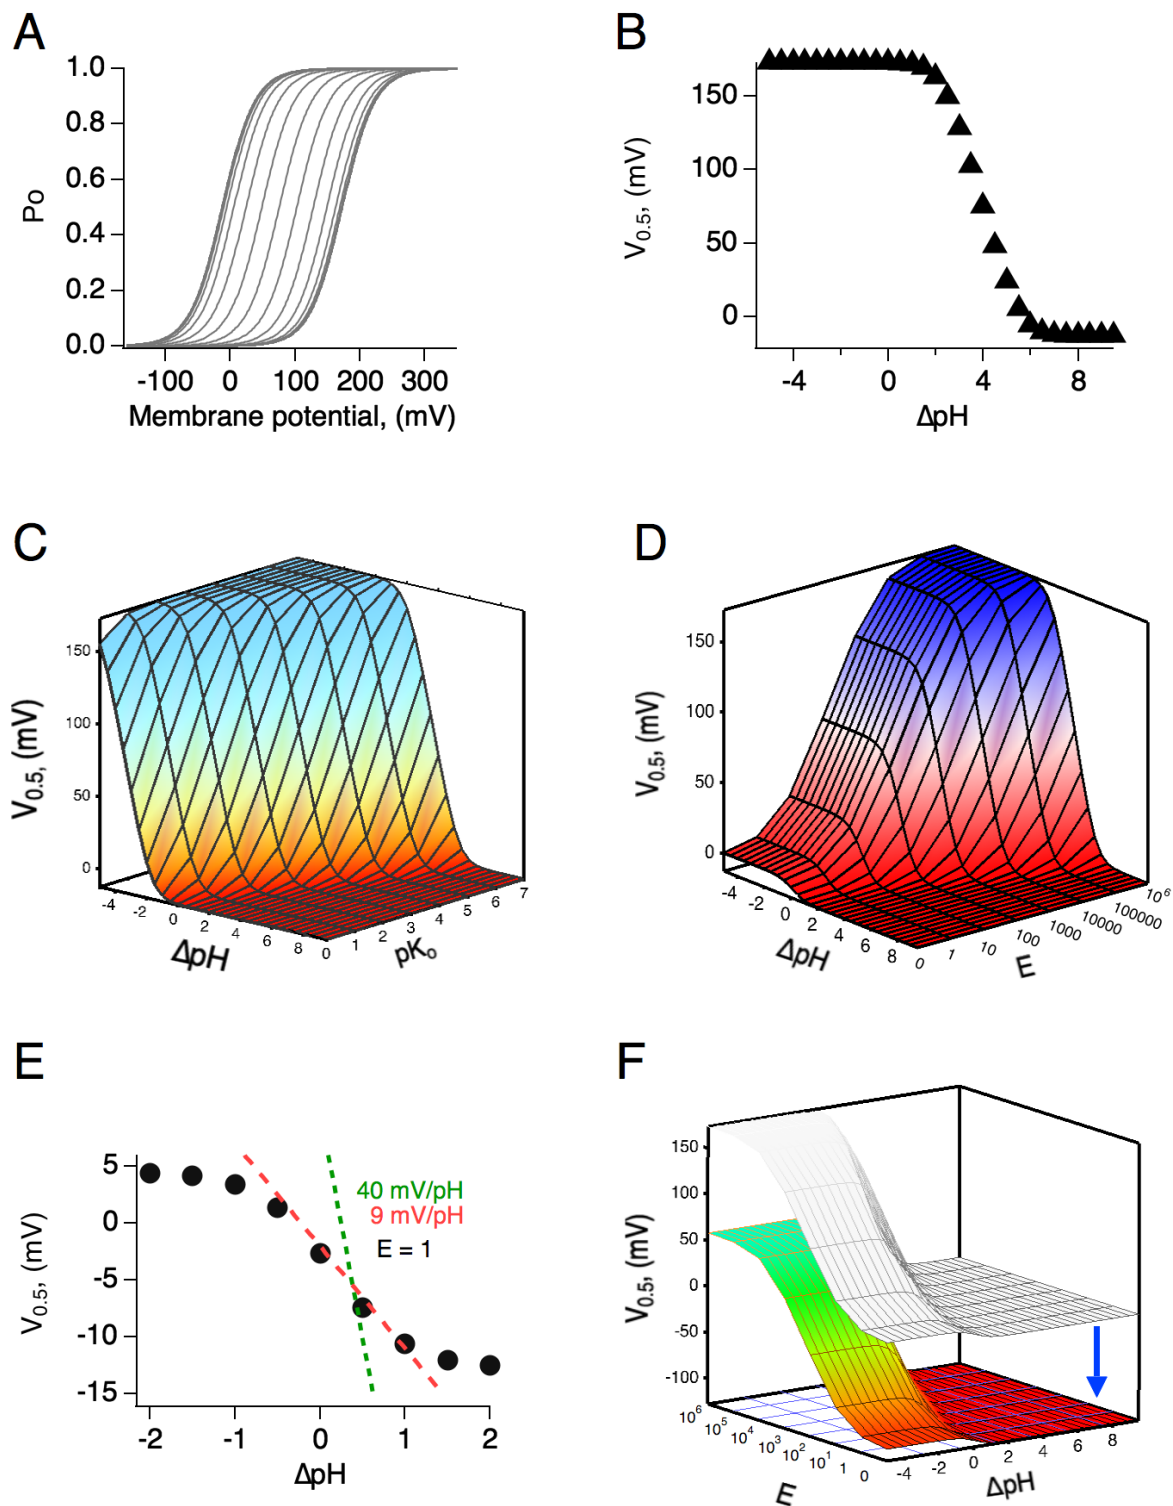

882

883 **Supplementary data-Figure 1.** Simulations of the voltage- and pH-dependent behavior  
884 predicted by the allosteric model. A) Calculated G-V curves and B)  $V_{0.5}$  as a function of  $\Delta pH$ .

885 Model parameters are:  $pK_o$ ,  $pK_i = 7$ ,  $K(0) = 0.00005$ ,  $q = 1 e_o$ ,  $E = 10^6$ ,  $C = 0.0002$ ,  $D = 10^5$ . C)  
886  $V_{0.5}$  as a function of  $\Delta pH$  calculated for different values of the  $pK_o$ . D)  $V_{0.5}$  as a function of  $\Delta pH$   
887 calculated for different values of the coupling factor  $E$ , which determines the allosteric  
888 communication between external and internal protonation sites. Note that lack of coupling  
889 between sites ( $E = 1$ ), results in channels with very shallow modulation by  $pH$ , as illustrated  
890 in E. All other parameters are as in A and B. E) A slice of the surface in D, with  $E = 1$ . The two  
891 lines show the expected dependence of  $V_{0.5}$  on  $\Delta pH$  for a fully modulated channel ( $E > 100$ ).  
892 Also shown is the dependence of  $9 \text{ mV}/\Delta pH$  unit. F) The range of  $V_{0.5}$  is dependent on the  
893 value of the voltage-dependent equilibrium constant at  $0 \text{ mV}$ . An increase to  $K(0) = 0.005$   
894 shifts the whole surface by approximately  $-110 \text{ mV}$ . All other parameters are as in D.
